# Supplementary material for: Sex‐ and Gender‐Based Reporting in Antihypertensive Medication Literature Informing Hypertension Guidelines
Source: PubMed Central journal article supplement — J Am Heart Assoc. 2024 Feb 29;13(5):e030613. doi: 10.1161/JAHA.123.030613 (PMC10944031; doi:10.1161/jaha.123.030613), 2024-02-29

# **SUPPLEMENTAL MATERIAL**

**Table S1.** Preferred Reporting Items for Systematic Review and Meta-Analysis **Protocols 2020 Checklist**

| Section and Topic             | Item # | Checklist item                                                                                                                                                                                                                                                                                       | Location where item is reported |
|-------------------------------|--------|------------------------------------------------------------------------------------------------------------------------------------------------------------------------------------------------------------------------------------------------------------------------------------------------------|---------------------------------|
| <b>TITLE</b>                  |        |                                                                                                                                                                                                                                                                                                      |                                 |
| Title                         | 1      | Identify the report as a systematic review.                                                                                                                                                                                                                                                          | NA                              |
| <b>ABSTRACT</b>               |        |                                                                                                                                                                                                                                                                                                      |                                 |
| Abstract                      | 2      | See the PRISMA 2020 for Abstracts checklist.                                                                                                                                                                                                                                                         | NA                              |
| <b>INTRODUCTION</b>           |        |                                                                                                                                                                                                                                                                                                      |                                 |
| Rationale                     | 3      | Describe the rationale for the review in the context of existing knowledge.                                                                                                                                                                                                                          | 4                               |
| Objectives                    | 4      | Provide an explicit statement of the objective(s) or question(s) the review addresses.                                                                                                                                                                                                               | 4                               |
| <b>METHODS</b>                |        |                                                                                                                                                                                                                                                                                                      |                                 |
| Eligibility criteria          | 5      | Specify the inclusion and exclusion criteria for the review and how studies were grouped for the syntheses.                                                                                                                                                                                          | 4, suppl 2                      |
| Information sources           | 6      | Specify all databases, registers, websites, organisations, reference lists and other sources searched or consulted to identify studies. Specify the date when each source was last searched or consulted.                                                                                            | 4                               |
| Search strategy               | 7      | Present the full search strategies for all databases, registers and websites, including any filters and limits used.                                                                                                                                                                                 | NA                              |
| Selection process             | 8      | Specify the methods used to decide whether a study met the inclusion criteria of the review, including how many reviewers screened each record and each report retrieved, whether they worked independently, and if applicable, details of automation tools used in the process.                     | 4                               |
| Data collection process       | 9      | Specify the methods used to collect data from reports, including how many reviewers collected data from each report, whether they worked independently, any processes for obtaining or confirming data from study investigators, and if applicable, details of automation tools used in the process. | 4-5                             |
| Data items                    | 10a    | List and define all outcomes for which data were sought. Specify whether all results that were compatible with each outcome domain in each study were sought (e.g. for all measures, time points, analyses), and if not, the methods used to decide which results to collect.                        | 4-5                             |
|                               | 10b    | List and define all other variables for which data were sought (e.g. participant and intervention characteristics, funding sources). Describe any assumptions made about any missing or unclear information.                                                                                         | 4-5                             |
| Study risk of bias assessment | 11     | Specify the methods used to assess risk of bias in the included studies, including details of the tool(s) used, how many reviewers assessed each study and whether they worked independently, and if applicable, details of automation tools used in the process.                                    | NA                              |
| Effect measures               | 12     | Specify for each outcome the effect measure(s) (e.g. risk ratio, mean difference) used in the synthesis or presentation of results.                                                                                                                                                                  | NA                              |
| Synthesis methods             | 13a    | Describe the processes used to decide which studies were eligible for each synthesis (e.g. tabulating the study intervention characteristics and comparing against the planned groups for each synthesis (item #5)).                                                                                 | NA                              |
|                               | 13b    | Describe any methods required to prepare the data for presentation or synthesis, such as handling of missing summary statistics, or data conversions.                                                                                                                                                | 4-5                             |

| Section and Topic             | Item # | Checklist item                                                                                                                                                                                                                                                                       | Location where item is reported |
|-------------------------------|--------|--------------------------------------------------------------------------------------------------------------------------------------------------------------------------------------------------------------------------------------------------------------------------------------|---------------------------------|
|                               | 13c    | Describe any methods used to tabulate or visually display results of individual studies and syntheses.                                                                                                                                                                               | 4-5                             |
|                               | 13d    | Describe any methods used to synthesize results and provide a rationale for the choice(s). If meta-analysis was performed, describe the model(s), method(s) to identify the presence and extent of statistical heterogeneity, and software package(s) used.                          | NA                              |
|                               | 13e    | Describe any methods used to explore possible causes of heterogeneity among study results (e.g. subgroup analysis, meta-regression).                                                                                                                                                 | NA                              |
|                               | 13f    | Describe any sensitivity analyses conducted to assess robustness of the synthesized results.                                                                                                                                                                                         | NA                              |
| Reporting bias assessment     | 14     | Describe any methods used to assess risk of bias due to missing results in a synthesis (arising from reporting biases).                                                                                                                                                              | NA                              |
| Certainty assessment          | 15     | Describe any methods used to assess certainty (or confidence) in the body of evidence for an outcome.                                                                                                                                                                                | NA                              |
| <b>RESULTS</b>                |        |                                                                                                                                                                                                                                                                                      |                                 |
| Study selection               | 16a    | Describe the results of the search and selection process, from the number of records identified in the search to the number of studies included in the review, ideally using a flow diagram.                                                                                         | 4                               |
|                               | 16b    | Cite studies that might appear to meet the inclusion criteria, but which were excluded, and explain why they were excluded.                                                                                                                                                          | NA                              |
| Study characteristics         | 17     | Cite each included study and present its characteristics.                                                                                                                                                                                                                            | Suppl 3                         |
| Risk of bias in studies       | 18     | Present assessments of risk of bias for each included study.                                                                                                                                                                                                                         | NA                              |
| Results of individual studies | 19     | For all outcomes, present, for each study: (a) summary statistics for each group (where appropriate) and (b) an effect estimate and its precision (e.g. confidence/credible interval), ideally using structured tables or plots.                                                     | NA                              |
| Results of syntheses          | 20a    | For each synthesis, briefly summarise the characteristics and risk of bias among contributing studies.                                                                                                                                                                               | NA                              |
|                               | 20b    | Present results of all statistical syntheses conducted. If meta-analysis was done, present for each the summary estimate and its precision (e.g. confidence/credible interval) and measures of statistical heterogeneity. If comparing groups, describe the direction of the effect. | NA                              |
|                               | 20c    | Present results of all investigations of possible causes of heterogeneity among study results.                                                                                                                                                                                       | NA                              |
|                               | 20d    | Present results of all sensitivity analyses conducted to assess the robustness of the synthesized results.                                                                                                                                                                           | NA                              |
| Reporting biases              | 21     | Present assessments of risk of bias due to missing results (arising from reporting biases) for each synthesis assessed.                                                                                                                                                              | NA                              |
| Certainty of evidence         | 22     | Present assessments of certainty (or confidence) in the body of evidence for each outcome assessed.                                                                                                                                                                                  | NA                              |
| <b>DISCUSSION</b>             |        |                                                                                                                                                                                                                                                                                      |                                 |
| Discussion                    | 23a    | Provide a general interpretation of the results in the context of other evidence.                                                                                                                                                                                                    | 5-6                             |

| Section and Topic                              | Item # | Checklist item                                                                                                                                                                                                                             | Location where item is reported |
|------------------------------------------------|--------|--------------------------------------------------------------------------------------------------------------------------------------------------------------------------------------------------------------------------------------------|---------------------------------|
|                                                | 23b    | Discuss any limitations of the evidence included in the review.                                                                                                                                                                            | 4, 6                            |
|                                                | 23c    | Discuss any limitations of the review processes used.                                                                                                                                                                                      | NA                              |
|                                                | 23d    | Discuss implications of the results for practice, policy, and future research.                                                                                                                                                             | 6-7                             |
| <b>OTHER INFORMATION</b>                       |        |                                                                                                                                                                                                                                            |                                 |
| Registration and protocol                      | 24a    | Provide registration information for the review, including register name and registration number, or state that the review was not registered.                                                                                             | NA                              |
|                                                | 24b    | Indicate where the review protocol can be accessed, or state that a protocol was not prepared.                                                                                                                                             | NA                              |
|                                                | 24c    | Describe and explain any amendments to information provided at registration or in the protocol.                                                                                                                                            | NA                              |
| Support                                        | 25     | Describe sources of financial or non-financial support for the review, and the role of the funders or sponsors in the review.                                                                                                              | 7                               |
| Competing interests                            | 26     | Declare any competing interests of review authors.                                                                                                                                                                                         | NA                              |
| Availability of data, code and other materials | 27     | Report which of the following are publicly available and where they can be found: template data collection forms; data extracted from included studies; data used for all analyses; analytic code; any other materials used in the review. | NA                              |

NA: Not Applicable

**Table S2. Selection criteria of studies.**

| <b>Inclusion Criteria</b>                                                                                                                                                                                                                                                                                                                                                                                                                                                                                                                                                                              | <b>Exclusion Criteria</b>                                                                               |
|--------------------------------------------------------------------------------------------------------------------------------------------------------------------------------------------------------------------------------------------------------------------------------------------------------------------------------------------------------------------------------------------------------------------------------------------------------------------------------------------------------------------------------------------------------------------------------------------------------|---------------------------------------------------------------------------------------------------------|
| <ul style="list-style-type: none"><li>• Cited in the International Society of Hypertension (2020), Latin American Society of Hypertension (2017), European Society of Cardiology/European Society of Hypertension (2018), Pan-African Society of Cardiology (2020), American College of Cardiology/American Heart Association (2017) or Hypertension Canada (2020) guidelines</li><li>• Original studies with any of the following study designs: observational studies, randomized controlled trials and systematic reviews</li><li>• The study was related to antihypertensive medications</li></ul> | <ul style="list-style-type: none"><li>• Commentaries, guidelines</li><li>• Single sex studies</li></ul> |

**Table S3. Reference list of included studies which reported the sex of participants.**

1. Prevention of stroke by antihypertensive drug treatment in older persons with isolated systolic hypertension. Final results of the Systolic Hypertension in the Elderly Program (SHEP). SHEP Cooperative Research Group. *JAMA*. 1991;265:3255-3264.
2. Agodoa LY, Appel L, Bakris GL, Beck G, Bourgoignie J, Briggs JP, Charleston J, Cheek D, Cleveland W, Douglas JG, et al. Effect of ramipril vs amlodipine on renal outcomes in hypertensive nephrosclerosis: a randomized controlled trial. *JAMA*. 2001;285:2719-2728. doi: 10.1001/jama.285.21.2719
3. Ahmed N, Wahlgren N, Brainin M, Castillo J, Ford GA, Kaste M, Lees KR, Toni D, Investigators S. Relationship of blood pressure, antihypertensive therapy, and outcome in ischemic stroke treated with intravenous thrombolysis: retrospective analysis from Safe Implementation of Thrombolysis in Stroke-International Stroke Thrombolysis Register (SITS-ISTR). *Stroke*. 2009;40:2442-2449. doi: 10.1161/STROKEAHA.109.548602
4. Anderson C, Teo K, Gao P, Arima H, Dans A, Unger T, Commerford P, Dyal L, Schumacher H, Pogue J, et al. Renin-angiotensin system blockade and cognitive function in patients at high risk of cardiovascular disease: analysis of data from the ONTARGET and TRANSCEND studies. *Lancet Neurol*. 2011;10:43-53. doi: 10.1016/S1474-4422(10)70250-7
5. Anderson CS, Heeley E, Huang Y, Wang J, Stapf C, Delcourt C, Lindley R, Robinson T, Lavados P, Neal B, et al. Rapid blood-pressure lowering in patients with acute intracerebral hemorrhage. *N Engl J Med*. 2013;368:2355-2365. doi: 10.1056/NEJMoa1214609
6. Anderson CS, Huang Y, Wang JG, Arima H, Neal B, Peng B, Heeley E, Skulina C, Parsons MW, Kim JS, et al. Intensive blood pressure reduction in acute cerebral haemorrhage trial (INTERACT): a randomised pilot trial. *Lancet Neurol*. 2008;7:391-399. doi: 10.1016/S1474-4422(08)70069-3
7. Andersson C, Merie C, Jorgensen M, Gislason GH, Torp-Pedersen C, Overgaard C, Kober L, Jensen PF, Hlatky MA. Association of beta-blocker therapy with risks of adverse cardiovascular events and deaths in patients with ischemic heart disease undergoing noncardiac surgery: a Danish nationwide cohort study. *JAMA Intern Med*. 2014;174:336-344. doi: 10.1001/jamainternmed.2013.11349
8. Antihypertensive, Lipid-Lowering Treatment to Prevent Heart Attack Trial Collaborative Research G. Diuretic versus alpha-blocker as first-step antihypertensive therapy: final results from the Antihypertensive and Lipid-Lowering Treatment to Prevent Heart Attack Trial (ALLHAT). *Hypertension*. 2003;42:239-246. doi: 10.1161/01.HYP.0000086521.95630.5A
9. Antihypertensive Treatment of Acute Cerebral Hemorrhage i. Antihypertensive treatment of acute cerebral hemorrhage. *Crit Care Med*. 2010;38:637-648. doi: 10.1097/CCM.0b013e3181b9e1a5
10. Appel LJ, Wright JT, Jr., Greene T, Agodoa LY, Astor BC, Bakris GL, Cleveland WH, Charleston J, Contreras G, Faulkner ML, et al. Intensive blood-pressure control in hypertensive chronic kidney disease. *N Engl J Med*. 2010;363:918-929. doi: 10.1056/NEJMoa0910975
11. Arima H, Chalmers J, Woodward M, Anderson C, Rodgers A, Davis S, Macmahon S, Neal B, Group PC. Lower target blood pressures are safe and effective for the prevention of recurrent stroke: the PROGRESS trial. *J Hypertens*. 2006;24:1201-1208. doi: 10.1097/01.hjh.0000226212.34055.86
12. Aronow WS, Ahn C, Kronzon I. Effect of propranolol versus no propranolol on total mortality plus nonfatal myocardial infarction in older patients with prior myocardial infarction,

congestive heart failure, and left ventricular ejection fraction  $\geq$  40% treated with diuretics plus angiotensin-converting enzyme inhibitors. *Am J Cardiol.* 1997;80:207-209. doi: 10.1016/s0002-9149(97)00320-2

13. Aronow WS, Turbow M, Van Camp S, Lurie M, Whittaker K. The effect of timolol vs placebo on angina pectoris. *Circulation.* 1980;61:66-69. doi: 10.1161/01.cir.61.1.66
14. Aronson S, Dyke CM, Stierer KA, Levy JH, Cheung AT, Lumb PD, Kereiakes DJ, Newman MF. The ECLIPSE trials: comparative studies of clevidipine to nitroglycerin, sodium nitroprusside, and nicardipine for acute hypertension treatment in cardiac surgery patients. *Anesth Analg.* 2008;107:1110-1121. doi: 10.1213/ane.0b013e31818240db
15. Ayala DE, Hermida RC, Mojon A, Fernandez JR. Cardiovascular risk of resistant hypertension: dependence on treatment-time regimen of blood pressure-lowering medications. *Chronobiol Int.* 2013;30:340-352. doi: 10.3109/07420528.2012.701455
16. Ayers K, Byrne LM, DeMatteo A, Brown NJ. Differential effects of nebivolol and metoprolol on insulin sensitivity and plasminogen activator inhibitor in the metabolic syndrome. *Hypertension.* 2012;59:893-898. doi: 10.1161/HYPERTENSIONAHA.111.189589
17. Azizi M, Sapoval M, Gosse P, Monge M, Bobrie G, Delsart P, Midulla M, Mounier-Vehier C, Courand PY, Lantelme P, et al. Optimum and stepped care standardised antihypertensive treatment with or without renal denervation for resistant hypertension (DENERHTN): a multicentre, open-label, randomised controlled trial. *Lancet.* 2015;385:1957-1965. doi: 10.1016/S0140-6736(14)61942-5
18. Bakris GL, Fonseca V, Katholi RE, McGill JB, Messerli FH, Phillips RA, Raskin P, Wright JT, Jr., Oakes R, Lukas MA, et al. Metabolic effects of carvedilol vs metoprolol in patients with type 2 diabetes mellitus and hypertension: a randomized controlled trial. *JAMA.* 2004;292:2227-2236. doi: 10.1001/jama.292.18.2227
19. Bakris GL, Lindholm LH, Black HR, Krum H, Linas S, Linseman JV, Arterburn S, Sager P, Weber M. Divergent results using clinic and ambulatory blood pressures: report of a darusentan-resistant hypertension trial. *Hypertension.* 2010;56:824-830. doi: 10.1161/HYPERTENSIONAHA.110.156976
20. Bangalore S, Kumar S, Lobach I, Messerli FH. Blood pressure targets in subjects with type 2 diabetes mellitus/impaired fasting glucose: observations from traditional and bayesian random-effects meta-analyses of randomized trials. *Circulation.* 2011;123:2799-2810, 2799 p following 2810. doi: 10.1161/CIRCULATIONAHA.110.016337
21. Barrett TW, Mori M, De Boer D. Association of ambulatory use of statins and beta-blockers with long-term mortality after vascular surgery. *J Hosp Med.* 2007;2:241-252. doi: 10.1002/jhm.160
22. Bavishi C, Bangalore S, Messerli FH. Outcomes of Intensive Blood Pressure Lowering in Older Hypertensive Patients. *J Am Coll Cardiol.* 2017;69:486-493. doi: 10.1016/j.jacc.2016.10.077
23. Bavry AA, Anderson RD, Gong Y, Denardo SJ, Cooper-Dehoff RM, Handberg EM, Pepine CJ. Outcomes Among hypertensive patients with concomitant peripheral and coronary artery disease: findings from the INternational VErapamil-SR/Trandolapril STudy. *Hypertension.* 2010;55:48-53. doi: 10.1161/HYPERTENSIONAHA.109.142240
24. Beckett N, Peters R, Leonetti G, Duggan J, Fagard R, Thijs L, Narkiewicz K, McCormack T, Banya W, Fletcher A, et al. Subgroup and per-protocol analyses from the Hypertension in the Very Elderly Trial. *J Hypertens.* 2014;32:1478-1487; discussion 1487. doi: 10.1097/HJH.0000000000000195

25. Beckett NS, Peters R, Fletcher AE, Staessen JA, Liu L, Dumitrascu D, Stoyanovsky V, Antikainen RL, Nikitin Y, Anderson C, et al. Treatment of hypertension in patients 80 years of age or older. *N Engl J Med*. 2008;358:1887-1898. doi: 10.1056/NEJMoa0801369
26. Bhatt DL, Kandzari DE, O'Neill WW, D'Agostino R, Flack JM, Katzen BT, Leon MB, Liu M, Mauri L, Negoita M, et al. A controlled trial of renal denervation for resistant hypertension. *N Engl J Med*. 2014;370:1393-1401. doi: 10.1056/NEJMoa1402670
27. Bisognano JD, Bakris G, Nadim MK, Sanchez L, Kroon AA, Schafer J, de Leeuw PW, Sica DA. Baroreflex activation therapy lowers blood pressure in patients with resistant hypertension: results from the double-blind, randomized, placebo-controlled reos pivotal trial. *J Am Coll Cardiol*. 2011;58:765-773. doi: 10.1016/j.jacc.2011.06.008
28. Black HR, Davis B, Barzilay J, Nwachuku C, Baimbridge C, Marginean H, Wright JT, Jr., Basile J, Wong ND, Whelton P, et al. Metabolic and clinical outcomes in nondiabetic individuals with the metabolic syndrome assigned to chlorthalidone, amlodipine, or lisinopril as initial treatment for hypertension: a report from the Antihypertensive and Lipid-Lowering Treatment to Prevent Heart Attack Trial (ALLHAT). *Diabetes Care*. 2008;31:353-360. doi: 10.2337/dc07-1452
29. Black HR, Elliott WJ, Grandits G, Grambsch P, Lucente T, White WB, Neaton JD, Grimm RH, Jr., Hansson L, Lacourciere Y, et al. Principal results of the Controlled Onset Verapamil Investigation of Cardiovascular End Points (CONVINCE) trial. *JAMA*. 2003;289:2073-2082. doi: 10.1001/jama.289.16.2073
30. Blood Pressure Lowering Treatment Trialists C. Blood pressure-lowering treatment based on cardiovascular risk: a meta-analysis of individual patient data. *Lancet*. 2014;384:591-598. doi: 10.1016/S0140-6736(14)61212-5
31. Blood Pressure Lowering Treatment Trialists C, Ninomiya T, Perkovic V, Turnbull F, Neal B, Barzi F, Cass A, Baigent C, Chalmers J, Li N, et al. Blood pressure lowering and major cardiovascular events in people with and without chronic kidney disease: meta-analysis of randomised controlled trials. *BMJ*. 2013;347:f5680. doi: 10.1136/bmj.f5680
32. Blood Pressure Lowering Treatment Trialists C, Turnbull F, Neal B, Ninomiya T, Algert C, Arima H, Barzi F, Bulpitt C, Chalmers J, Fagard R, et al. Effects of different regimens to lower blood pressure on major cardiovascular events in older and younger adults: meta-analysis of randomised trials. *BMJ*. 2008;336:1121-1123. doi: 10.1136/bmj.39548.738368.BE
33. Bohm M, Mahfoud F, Ukena C, Hoppe UC, Narkiewicz K, Negoita M, Ruilope L, Schlaich MP, Schmieder RE, Whitbourn R, et al. First report of the Global SYMPLICITY Registry on the effect of renal artery denervation in patients with uncontrolled hypertension. *Hypertension*. 2015;65:766-774. doi: 10.1161/HYPERTENSIONAHA.114.05010
34. Bohm M, Schumacher H, Teo KK, Lonn EM, Mahfoud F, Mann JFE, Mancina G, Redon J, Schmieder RE, Sliwa K, et al. Achieved blood pressure and cardiovascular outcomes in high-risk patients: results from ONTARGET and TRANSCEND trials. *Lancet*. 2017;389:2226-2237. doi: 10.1016/S0140-6736(17)30754-7
35. Bohm M, Young R, Jhund PS, Solomon SD, Gong J, Lefkowitz MP, Rizkala AR, Rouleau JL, Shi VC, Swedberg K, et al. Systolic blood pressure, cardiovascular outcomes and efficacy and safety of sacubitril/valsartan (LCZ696) in patients with chronic heart failure and reduced ejection fraction: results from PARADIGM-HF. *Eur Heart J*. 2017;38:1132-1143. doi: 10.1093/eurheartj/ehw570
36. Bress AP, King JB, Kreider KE, Beddhu S, Simmons DL, Cheung AK, Zhang Y, Dumas M, Nord J, Sweeney ME, et al. Effect of Intensive Versus Standard Blood Pressure Treatment



According to Baseline Prediabetes Status: A Post Hoc Analysis of a Randomized Trial. *Diabetes Care*. 2017;40:1401-1408. doi: 10.2337/dc17-0885

37. Brown MJ, Palmer CR, Castaigne A, de Leeuw PW, Mancia G, Rosenthal T, Ruilope LM. Morbidity and mortality in patients randomised to double-blind treatment with a long-acting calcium-channel blocker or diuretic in the International Nifedipine GITS study: Intervention as a Goal in Hypertension Treatment (INSIGHT). *Lancet*. 2000;356:366-372. doi: 10.1016/S0140-6736(00)02527-7
38. Brown MJ, Williams B, Morant SV, Webb DJ, Caulfield MJ, Cruickshank JK, Ford I, McInnes G, Sever P, Salsbury J, et al. Effect of amiloride, or amiloride plus hydrochlorothiazide, versus hydrochlorothiazide on glucose tolerance and blood pressure (PATHWAY-3): a parallel-group, double-blind randomised phase 4 trial. *Lancet Diabetes Endocrinol*. 2016;4:136-147. doi: 10.1016/S2213-8587(15)00377-0
39. Bull S, Loudon M, Francis JM, Joseph J, Gerry S, Karamitsos TD, Prendergast BD, Banning AP, Neubauer S, Myerson SG. A prospective, double-blind, randomized controlled trial of the angiotensin-converting enzyme inhibitor Ramipril In Aortic Stenosis (RIAS trial). *Eur Heart J Cardiovasc Imaging*. 2015;16:834-841. doi: 10.1093/ehjci/jev043
40. Burnier M, Brede Y, Lowy A. Impact of prolonged antihypertensive duration of action on predicted clinical outcomes in imperfectly adherent patients: comparison of aliskiren, irbesartan and ramipril. *Int J Clin Pract*. 2011;65:127-133. doi: 10.1111/j.1742-1241.2010.02616.x
41. Cannon CM, Levy P, Baumann BM, Borczuk P, Chandra A, Cline DM, Diercks DB, Hiestand B, Hsu A, Jois P, et al. Intravenous nicardipine and labetalol use in hypertensive patients with signs or symptoms suggestive of end-organ damage in the emergency department: a subgroup analysis of the CLUE trial. *BMJ Open*. 2013;3. doi: 10.1136/bmjopen-2012-002338
42. Castellano JM, Sanz G, Penalvo JL, Bansilal S, Fernandez-Ortiz A, Alvarez L, Guzman L, Linares JC, Garcia F, D'Aniello F, et al. A polypill strategy to improve adherence: results from the FOCUS project. *J Am Coll Cardiol*. 2014;64:2071-2082. doi: 10.1016/j.jacc.2014.08.021
43. Chang AR, Sang Y, Leddy J, Yahya T, Kirchner HL, Inker LA, Matsushita K, Ballew SH, Coresh J, Grams ME. Antihypertensive Medications and the Prevalence of Hyperkalemia in a Large Health System. *Hypertension*. 2016;67:1181-1188. doi: 10.1161/HYPERTENSIONAHA.116.07363
44. Chapman N, Chang CL, Dahlof B, Sever PS, Wedel H, Poulter NR, Investigators A. Effect of doxazosin gastrointestinal therapeutic system as third-line antihypertensive therapy on blood pressure and lipids in the Anglo-Scandinavian Cardiac Outcomes Trial. *Circulation*. 2008;118:42-48. doi: 10.1161/CIRCULATIONAHA.107.737957
45. Chockalingam A, Venkatesan S, Subramaniam T, Jagannathan V, Elangovan S, Alagesan R, Gnanavelu G, Dorairajan S, Krishna BP, Chockalingam V, et al. Safety and efficacy of angiotensin-converting enzyme inhibitors in symptomatic severe aortic stenosis: Symptomatic Cardiac Obstruction-Pilot Study of Enalapril in Aortic Stenosis (SCOPE-AS). *Am Heart J*. 2004;147:E19. doi: 10.1016/j.ahj.2003.10.017
46. Cohn JN, Tognoni G, Valsartan Heart Failure Trial I. A randomized trial of the angiotensin-receptor blocker valsartan in chronic heart failure. *N Engl J Med*. 2001;345:1667-1675. doi: 10.1056/NEJMoa010713
47. Coiro S, Girerd N, Rossignol P, Ferreira JP, Maggioni A, Pitt B, Tritto I, Ambrosio G, Dickstein K, Zannad F. Association of beta-blocker treatment with mortality following myocardial infarction in patients with chronic obstructive pulmonary disease and heart failure or left ventricular dysfunction: a propensity matched-cohort analysis from the High-Risk

Myocardial Infarction Database Initiative. *Eur J Heart Fail.* 2017;19:271-279. doi: 10.1002/ejhf.647

48. Collier DJ, Poulter NR, Dahlof B, Sever PS, Wedel H, Buch J, Caulfield MJ, Investigators A. Impact of amlodipine-based therapy among older and younger patients in the Anglo-Scandinavian Cardiac Outcomes Trial-Blood Pressure Lowering Arm (ASCOT-BPLA). *J Hypertens.* 2011;29:583-591. doi: 10.1097/HJH.0b013e328342c845
49. Contreras G, Greene T, Agodoa LY, Cheek D, Junco G, Dowie D, Lash J, Lipkowitz M, Miller ER, 3rd, Ojo A, et al. Blood pressure control, drug therapy, and kidney disease. *Hypertension.* 2005;46:44-50. doi: 10.1161/01.HYP.0000166746.04472.60
50. Coope J, Warrender TS. Randomised trial of treatment of hypertension in elderly patients in primary care. *Br Med J (Clin Res Ed).* 1986;293:1145-1151. doi: 10.1136/bmj.293.6555.1145
51. Cooper CJ, Murphy TP, Cutlip DE, Jamerson K, Henrich W, Reid DM, Cohen DJ, Matsumoto AH, Steffes M, Jaff MR, et al. Stenting and medical therapy for atherosclerotic renal-artery stenosis. *N Engl J Med.* 2014;370:13-22. doi: 10.1056/NEJMoa1310753
52. Cooper-DeHoff RM, Aranda JM, Jr., Gaxiola E, Cangiano JL, Garcia-Barreto D, Conti CR, Hewkin A, Pepine CJ, Investigators I. Blood pressure control and cardiovascular outcomes in high-risk Hispanic patients--findings from the International Verapamil SR/Trandolapril Study (INVEST). *Am Heart J.* 2006;151:1072-1079. doi: 10.1016/j.ahj.2005.05.024
53. Corrao G, Parodi A, Zambon A, Heiman F, Filippi A, Cricelli C, Merlino L, Mancia G. Reduced discontinuation of antihypertensive treatment by two-drug combination as first step. Evidence from daily life practice. *J Hypertens.* 2010;28:1584-1590. doi: 10.1097/HJH.0b013e328339f9fa
54. Corrao G, Zambon A, Parodi A, Poluzzi E, Baldi I, Merlino L, Cesana G, Mancia G. Discontinuation of and changes in drug therapy for hypertension among newly-treated patients: a population-based study in Italy. *J Hypertens.* 2008;26:819-824. doi: 10.1097/HJH.0b013e3282f4edd7
55. Cushman WC, Ford CE, Cutler JA, Margolis KL, Davis BR, Grimm RH, Black HR, Hamilton BP, Holland J, Nwachuku C, et al. Success and predictors of blood pressure control in diverse North American settings: the antihypertensive and lipid-lowering treatment to prevent heart attack trial (ALLHAT). *J Clin Hypertens (Greenwich).* 2002;4:393-404. doi: 10.1111/j.1524-6175.2002.02045.x
56. Czernichow S, Ninomiya T, Huxley R, Kengne AP, Batty GD, Grobbee DE, Woodward M, Neal B, Chalmers J. Impact of blood pressure lowering on cardiovascular outcomes in normal weight, overweight, and obese individuals: the Perindopril Protection Against Recurrent Stroke Study trial. *Hypertension.* 2010;55:1193-1198. doi: 10.1161/HYPERTENSIONAHA.109.140624
57. Dahal K, Kunwar S, Rijal J, Alqatahni F, Panta R, Ishak N, Russell RP. The Effects of Aldosterone Antagonists in Patients With Resistant Hypertension: A Meta-Analysis of Randomized and Nonrandomized Studies. *Am J Hypertens.* 2015;28:1376-1385. doi: 10.1093/ajh/hpv031
58. Dahlof B, Devereux RB, Kjeldsen SE, Julius S, Beevers G, de Faire U, Fyhrquist F, Ibsen H, Kristiansson K, Lederballe-Pedersen O, et al. Cardiovascular morbidity and mortality in the Losartan Intervention For Endpoint reduction in hypertension study (LIFE): a randomised trial against atenolol. *Lancet.* 2002;359:995-1003. doi: 10.1016/S0140-6736(02)08089-3
59. Dahlof B, Lindholm LH, Hansson L, Schersten B, Ekbom T, Wester PO. Morbidity and mortality in the Swedish Trial in Old Patients with Hypertension (STOP-Hypertension). *Lancet.* 1991;338:1281-1285. doi: 10.1016/0140-6736(91)92589-t

60. Dahlof B, Sever PS, Poulter NR, Wedel H, Beevers DG, Caulfield M, Collins R, Kjeldsen SE, Kristinsson A, McInnes GT, et al. Prevention of cardiovascular events with an antihypertensive regimen of amlodipine adding perindopril as required versus atenolol adding bendroflumethiazide as required, in the Anglo-Scandinavian Cardiac Outcomes Trial-Blood Pressure Lowering Arm (ASCOT-BPLA): a multicentre randomised controlled trial. *Lancet*. 2005;366:895-906. doi: 10.1016/S0140-6736(05)67185-1
61. Damasceno A, Ferreira B, Patel S, Sevens E, Polonia J. Efficacy of captopril and nifedipine in black and white patients with hypertensive crisis. *J Hum Hypertens*. 1997;11:471-476. doi: 10.1038/sj.jhh.1000428
62. Daugherty SL, Powers JD, Magid DJ, Tavel HM, Masoudi FA, Margolis KL, O'Connor PJ, Selby JV, Ho PM. Incidence and prognosis of resistant hypertension in hypertensive patients. *Circulation*. 2012;125:1635-1642. doi: 10.1161/CIRCULATIONAHA.111.068064
63. Davis BR, Kostis JB, Simpson LM, Black HR, Cushman WC, Einhorn PT, Farber MA, Ford CE, Levy D, Massie BM, et al. Heart failure with preserved and reduced left ventricular ejection fraction in the antihypertensive and lipid-lowering treatment to prevent heart attack trial. *Circulation*. 2008;118:2259-2267. doi: 10.1161/CIRCULATIONAHA.107.762229
64. de Peuter OR, Lussana F, Peters RJ, Buller HR, Kamphuisen PW. A systematic review of selective and non-selective beta blockers for prevention of vascular events in patients with acute coronary syndrome or heart failure. *Neth J Med*. 2009;67:284-294.
65. de Simone G, Devereux RB, Izzo R, Girfoglio D, Lee ET, Howard BV, Roman MJ. Lack of reduction of left ventricular mass in treated hypertension: the strong heart study. *J Am Heart Assoc*. 2013;2:e000144. doi: 10.1161/JAHA.113.000144
66. Diener HC, Sacco RL, Yusuf S, Cotton D, Ounpuu S, Lawton WA, Palesch Y, Martin RH, Albers GW, Bath P, et al. Effects of aspirin plus extended-release dipyridamole versus clopidogrel and telmisartan on disability and cognitive function after recurrent stroke in patients with ischaemic stroke in the Prevention Regimen for Effectively Avoiding Second Strokes (PRoFESS) trial: a double-blind, active and placebo-controlled study. *Lancet Neurol*. 2008;7:875-884. doi: 10.1016/S1474-4422(08)70198-4
67. Dondo TB, Hall M, West RM, Jernberg T, Lindahl B, Bueno H, Danchin N, Deanfield JE, Hemingway H, Fox KAA, et al. beta-Blockers and Mortality After Acute Myocardial Infarction in Patients Without Heart Failure or Ventricular Dysfunction. *J Am Coll Cardiol*. 2017;69:2710-2720. doi: 10.1016/j.jacc.2017.03.578
68. Du X, Ninomiya T, de Galan B, Abadir E, Chalmers J, Pillai A, Woodward M, Cooper M, Harrap S, Hamet P, et al. Risks of cardiovascular events and effects of routine blood pressure lowering among patients with type 2 diabetes and atrial fibrillation: results of the ADVANCE study. *Eur Heart J*. 2009;30:1128-1135. doi: 10.1093/eurheartj/ehp055
69. Ducharme A, Swedberg K, Pfeffer MA, Cohen-Solal A, Granger CB, Maggioni AP, Michelson EL, McMurray JJ, Olsson L, Rouleau JL, et al. Prevention of atrial fibrillation in patients with symptomatic chronic heart failure by candesartan in the Candesartan in Heart failure: assessment of Reduction in Mortality and morbidity (CHARM) program. *Am Heart J*. 2006;151:985-991. doi: 10.1016/j.ahj.2005.06.036
70. Egan BM, Bandyopadhyay D, Shaftman SR, Wagner CS, Zhao Y, Yu-Isenberg KS. Initial monotherapy and combination therapy and hypertension control the first year. *Hypertension*. 2012;59:1124-1131. doi: 10.1161/HYPERTENSIONAHA.112.194167
71. Elgendy IY, Bavry AA, Gong Y, Handberg EM, Cooper-DeHoff RM, Pepine CJ. Long-Term Mortality in Hypertensive Patients With Coronary Artery Disease: Results From the US

- Cohort of the International Verapamil (SR)/Trandolapril Study. *Hypertension*. 2016;68:1110-1114. doi: 10.1161/HYPERTENSIONAHA.116.07854
72. Esnault VL, Brown EA, Apetrei E, Bagon J, Calvo C, DeChatel R, Holdaas H, Krcmery S, Kobalava Z, Amlodipine Versus Enalapril in Renal failure Study G. The effects of amlodipine and enalapril on renal function in adults with hypertension and nondiabetic nephropathies: a 3-year, randomized, multicenter, double-blind, placebo-controlled study. *Clin Ther*. 2008;30:482-498. doi: 10.1016/j.clinthera.2008.03.006
73. Estacio RO, Jeffers BW, Gifford N, Schrier RW. Effect of blood pressure control on diabetic microvascular complications in patients with hypertension and type 2 diabetes. *Diabetes Care*. 2000;23 Suppl 2:B54-64.
74. Evangelista A, Tornos P, Sambola A, Permanyer-Miralda G, Soler-Soler J. Long-term vasodilator therapy in patients with severe aortic regurgitation. *N Engl J Med*. 2005;353:1342-1349. doi: 10.1056/NEJMoa050666
75. Fagard RH, Staessen JA, Thijs L, Gasowski J, Bulpitt CJ, Clement D, de Leeuw PW, Dobovisek J, Jaaskivi M, Leonetti G, et al. Response to antihypertensive therapy in older patients with sustained and nonsustained systolic hypertension. Systolic Hypertension in Europe (Syst-Eur) Trial Investigators. *Circulation*. 2000;102:1139-1144. doi: 10.1161/01.cir.102.10.1139
76. Farias S, Peacock WF, Gonzalez M, Levy PD. Impact of initial blood pressure on antihypertensive response in patients with acute hypertension. *Am J Emerg Med*. 2014;32:833-836. doi: 10.1016/j.ajem.2014.03.021
77. Fletcher A, Beevers DG, Bulpitt C, Butler A, Coles EC, Hunt D, Munro-Faure AD, Newson RB, O'Riordan PW, Petrie JC, et al. Beta adrenoceptor blockade is associated with increased survival in male but not female hypertensive patients: a report from the DHSS Hypertension Care Computing Project (DHCCP). *J Hum Hypertens*. 1988;2:219-227.
78. Forette F, Seux ML, Staessen JA, Thijs L, Babarskiene MR, Babeanu S, Bossini A, Fagard R, Gil-Extremera B, Laks T, et al. The prevention of dementia with antihypertensive treatment: new evidence from the Systolic Hypertension in Europe (Syst-Eur) study. *Arch Intern Med*. 2002;162:2046-2052. doi: 10.1001/archinte.162.18.2046
79. Forette F, Seux ML, Staessen JA, Thijs L, Birkenhager WH, Babarskiene MR, Babeanu S, Bossini A, Gil-Extremera B, Girerd X, et al. Prevention of dementia in randomised double-blind placebo-controlled Systolic Hypertension in Europe (Syst-Eur) trial. *Lancet*. 1998;352:1347-1351. doi: 10.1016/s0140-6736(98)03086-4
80. Fourkoti V, Vonend O, Diederich S, Fischer E, Lang K, Endres S, Beuschlein F, Willenberg HS, Rump LC, Allolio B, et al. Effectiveness of eplerenone or spironolactone treatment in preserving renal function in primary aldosteronism. *Eur J Endocrinol*. 2013;168:75-81. doi: 10.1530/EJE-12-0631
81. Fox KM, Investigators EUtOrocewPiscAd. Efficacy of perindopril in reduction of cardiovascular events among patients with stable coronary artery disease: randomised, double-blind, placebo-controlled, multicentre trial (the EUROPA study). *Lancet*. 2003;362:782-788. doi: 10.1016/s0140-6736(03)14286-9
82. Fried LF, Emanuele N, Zhang JH, Brophy M, Conner TA, Duckworth W, Leehey DJ, McCullough PA, O'Connor T, Palevsky PM, et al. Combined angiotensin inhibition for the treatment of diabetic nephropathy. *N Engl J Med*. 2013;369:1892-1903. doi: 10.1056/NEJMoa1303154
83. Fuchs SC, Poli-de-Figueiredo CE, Figueiredo Neto JA, Scala LC, Whelton PK, Mosele F, de Mello RB, Vilela-Martin JF, Moreira LB, Chaves H, et al. Effectiveness of Chlorthalidone

Plus Amiloride for the Prevention of Hypertension: The PREVER-Prevention Randomized Clinical Trial. *J Am Heart Assoc.* 2016;5. doi: 10.1161/JAHA.116.004248

84. Genoni M, Paul M, Jenni R, Graves K, Seifert B, Turina M. Chronic beta-blocker therapy improves outcome and reduces treatment costs in chronic type B aortic dissection. *Eur J Cardiothorac Surg.* 2001;19:606-610. doi: 10.1016/s1010-7940(01)00662-5

85. Gerds E, Wachtell K, Omvik P, Otterstad JE, Oikarinen L, Boman K, Dahlof B, Devereux RB. Left atrial size and risk of major cardiovascular events during antihypertensive treatment: losartan intervention for endpoint reduction in hypertension trial. *Hypertension.* 2007;49:311-316. doi: 10.1161/01.HYP.0000254322.96189.85

86. Giatras I, Lau J, Levey AS. Effect of angiotensin-converting enzyme inhibitors on the progression of nondiabetic renal disease: a meta-analysis of randomized trials. Angiotensin-Converting-Enzyme Inhibition and Progressive Renal Disease Study Group. *Ann Intern Med.* 1997;127:337-345. doi: 10.7326/0003-4819-127-5-199709010-00001

87. Godin O, Tzourio C, Maillard P, Mazoyer B, Dufouil C. Antihypertensive treatment and change in blood pressure are associated with the progression of white matter lesion volumes: the Three-City (3C)-Dijon Magnetic Resonance Imaging Study. *Circulation.* 2011;123:266-273. doi: 10.1161/CIRCULATIONAHA.110.961052

88. Goette A, Schon N, Kirchhof P, Breithardt G, Fetsch T, Hausler KG, Klein HU, Steinbeck G, Wegscheider K, Meinertz T. Angiotensin II-antagonist in paroxysmal atrial fibrillation (ANTIPAF) trial. *Circ Arrhythm Electrophysiol.* 2012;5:43-51. doi: 10.1161/CIRCEP.111.965178

89. Goldstein RE, Boccuzzi SJ, Cruess D, Nattel S. Diltiazem increases late-onset congestive heart failure in postinfarction patients with early reduction in ejection fraction. The Adverse Experience Committee; and the Multicenter Diltiazem Postinfarction Research Group. *Circulation.* 1991;83:52-60. doi: 10.1161/01.cir.83.1.52

90. Grassi D, O'Flaherty M, Pellizzari M, Bendersky M, Rodriguez P, Turri D, Forcada P, Ferdinand KC, Kotliar C, Group of Investigators of the RP. Hypertensive urgencies in the emergency department: evaluating blood pressure response to rest and to antihypertensive drugs with different profiles. *J Clin Hypertens (Greenwich).* 2008;10:662-667. doi: 10.1111/j.1751-7176.2008.00001.x

91. Groenink M, den Hartog AW, Franken R, Radonic T, de Waard V, Timmermans J, Scholte AJ, van den Berg MP, Spijkerboer AM, Marquering HA, et al. Losartan reduces aortic dilatation rate in adults with Marfan syndrome: a randomized controlled trial. *Eur Heart J.* 2013;34:3491-3500. doi: 10.1093/eurheartj/eh334

92. Group AS, Cushman WC, Evans GW, Byington RP, Goff DC, Jr., Grimm RH, Jr., Cutler JA, Simons-Morton DG, Basile JN, Corson MA, et al. Effects of intensive blood-pressure control in type 2 diabetes mellitus. *N Engl J Med.* 2010;362:1575-1585. doi: 10.1056/NEJMoa1001286

93. Group PC. Post-stroke antihypertensive treatment study. A preliminary result. *Chin Med J (Engl).* 1995;108:710-717.

94. Group PC. Randomised trial of a perindopril-based blood-pressure-lowering regimen among 6,105 individuals with previous stroke or transient ischaemic attack. *Lancet.* 2001;358:1033-1041. doi: 10.1016/S0140-6736(01)06178-5

95. Group PS, Devereaux PJ, Yang H, Yusuf S, Guyatt G, Leslie K, Villar JC, Xavier D, Chrolavicius S, Greenspan L, et al. Effects of extended-release metoprolol succinate in patients undergoing non-cardiac surgery (POISE trial): a randomised controlled trial. *Lancet.* 2008;371:1839-1847. doi: 10.1016/S0140-6736(08)60601-7

96. Group SPSS, Benavente OR, Coffey CS, Conwit R, Hart RG, McClure LA, Pearce LA, Pergola PE, Szychowski JM. Blood-pressure targets in patients with recent lacunar stroke: the SPS3 randomised trial. *Lancet*. 2013;382:507-515. doi: 10.1016/S0140-6736(13)60852-1
97. Group UKPDS. Tight blood pressure control and risk of macrovascular and microvascular complications in type 2 diabetes: UKPDS 38. UK Prospective Diabetes Study Group. *BMJ*. 1998;317:703-713.
98. Guerin AP, Blacher J, Pannier B, Marchais SJ, Safar ME, London GM. Impact of aortic stiffness attenuation on survival of patients in end-stage renal failure. *Circulation*. 2001;103:987-992. doi: 10.1161/01.cir.103.7.987
99. Gueyffier F, Boutitie F, Boissel JP, Pocock S, Coope J, Cutler J, Ekblom T, Fagard R, Friedman L, Perry M, et al. Effect of antihypertensive drug treatment on cardiovascular outcomes in women and men. A meta-analysis of individual patient data from randomized, controlled trials. The INDANA Investigators. *Ann Intern Med*. 1997;126:761-767. doi: 10.7326/0003-4819-126-10-199705150-00002
100. Gupta AK, Arshad S, Poulter NR. Compliance, safety, and effectiveness of fixed-dose combinations of antihypertensive agents: a meta-analysis. *Hypertension*. 2010;55:399-407. doi: 10.1161/HYPERTENSIONAHA.109.139816
101. Haller H, Ito S, Izzo JL, Jr., Januszewicz A, Katayama S, Menne J, Mimran A, Rabelink TJ, Ritz E, Ruilope LM, et al. Olmesartan for the delay or prevention of microalbuminuria in type 2 diabetes. *N Engl J Med*. 2011;364:907-917. doi: 10.1056/NEJMoa1007994
102. Hansson L, Hedner T, Lund-Johansen P, Kjeldsen SE, Lindholm LH, Syvertsen JO, Lanke J, de Faire U, Dahlof B, Karlberg BE. Randomised trial of effects of calcium antagonists compared with diuretics and beta-blockers on cardiovascular morbidity and mortality in hypertension: the Nordic Diltiazem (NORDIL) study. *Lancet*. 2000;356:359-365. doi: 10.1016/s0140-6736(00)02526-5
103. Hansson L, Lindholm LH, Ekblom T, Dahlof B, Lanke J, Schersten B, Wester PO, Hedner T, de Faire U. Randomised trial of old and new antihypertensive drugs in elderly patients: cardiovascular mortality and morbidity the Swedish Trial in Old Patients with Hypertension-2 study. *Lancet*. 1999;354:1751-1756. doi: 10.1016/s0140-6736(99)10327-1
104. Hansson L, Lindholm LH, Niskanen L, Lanke J, Hedner T, Niklason A, Luomanmaki K, Dahlof B, de Faire U, Morlin C, et al. Effect of angiotensin-converting-enzyme inhibition compared with conventional therapy on cardiovascular morbidity and mortality in hypertension: the Captopril Prevention Project (CAPPP) randomised trial. *Lancet*. 1999;353:611-616. doi: 10.1016/s0140-6736(98)05012-0
105. Hansson L, Zanchetti A, Carruthers SG, Dahlof B, Elmfeldt D, Julius S, Menard J, Rahn KH, Wedel H, Westerling S. Effects of intensive blood-pressure lowering and low-dose aspirin in patients with hypertension: principal results of the Hypertension Optimal Treatment (HOT) randomised trial. HOT Study Group. *Lancet*. 1998;351:1755-1762. doi: 10.1016/s0140-6736(98)04311-6
106. Haywood LJ, Ford CE, Crow RS, Davis BR, Massie BM, Einhorn PT, Williard A, Group ACR. Atrial fibrillation at baseline and during follow-up in ALLHAT (Antihypertensive and Lipid-Lowering Treatment to Prevent Heart Attack Trial). *J Am Coll Cardiol*. 2009;54:2023-2031. doi: 10.1016/j.jacc.2009.08.020
107. Heart Outcomes Prevention Evaluation Study I, Yusuf S, Sleight P, Pogue J, Bosch J, Davies R, Dagenais G. Effects of an angiotensin-converting-enzyme inhibitor, ramipril, on

- cardiovascular events in high-risk patients. *N Engl J Med.* 2000;342:145-153. doi: 10.1056/NEJM200001203420301
108. Hedner T. Progress report on the Nordic diltiazem study (NORDIL): an outcome study in hypertensive patients. *Blood Press.* 1999;8:296-299. doi: 10.1080/080370599439517
109. Heerspink HJ, Ninomiya T, Perkovic V, Woodward M, Zoungas S, Cass A, Cooper M, Grobbee DE, Mancia G, Mogensen CE, et al. Effects of a fixed combination of perindopril and indapamide in patients with type 2 diabetes and chronic kidney disease. *Eur Heart J.* 2010;31:2888-2896. doi: 10.1093/eurheartj/ehq139
110. Hillebrand U, Suwelack BM, Loley K, Lang D, Reuter S, Amler S, Pavenstadt H, Hausberg M, Bussemaker E. Blood pressure, antihypertensive treatment, and graft survival in kidney transplant patients. *Transpl Int.* 2009;22:1073-1080. doi: 10.1111/j.1432-2277.2009.00922.x
111. Hoeks SE, Scholte Op Reimer WJ, van Urk H, Jorning PJ, Boersma E, Simoons ML, Bax JJ, Poldermans D. Increase of 1-year mortality after perioperative beta-blocker withdrawal in endovascular and vascular surgery patients. *Eur J Vasc Endovasc Surg.* 2007;33:13-19. doi: 10.1016/j.ejvs.2006.06.019
112. Holtkamp FA, de Zeeuw D, Thomas MC, Cooper ME, de Graeff PA, Hillege HJ, Parving HH, Brenner BM, Shahinfar S, Lambers Heerspink HJ. An acute fall in estimated glomerular filtration rate during treatment with losartan predicts a slower decrease in long-term renal function. *Kidney Int.* 2011;80:282-287. doi: 10.1038/ki.2011.79
113. Ibsen H, Olsen MH, Wachtell K, Borch-Johnsen K, Lindholm LH, Mogensen CE, Dahlof B, Devereux RB, de Faire U, Fyhrquist F, et al. Reduction in albuminuria translates to reduction in cardiovascular events in hypertensive patients: losartan intervention for endpoint reduction in hypertension study. *Hypertension.* 2005;45:198-202. doi: 10.1161/01.HYP.0000154082.72286.2a
114. Investigators ET. Efficacy of nitric oxide, with or without continuing antihypertensive treatment, for management of high blood pressure in acute stroke (ENOS): a partial-factorial randomised controlled trial. *Lancet.* 2015;385:617-628. doi: 10.1016/S0140-6736(14)61121-1
115. Investigators G-A, Disertori M, Latini R, Barlera S, Franzosi MG, Staszewsky L, Maggioni AP, Lucci D, Di Pasquale G, Tognoni G. Valsartan for prevention of recurrent atrial fibrillation. *N Engl J Med.* 2009;360:1606-1617. doi: 10.1056/NEJMoa0805710
116. Investigators O, Yusuf S, Teo KK, Pogue J, Dyal L, Copland I, Schumacher H, Dagenais G, Sleight P, Anderson C. Telmisartan, ramipril, or both in patients at high risk for vascular events. *N Engl J Med.* 2008;358:1547-1559. doi: 10.1056/NEJMoa0801317
117. Izzo R, Losi MA, Stabile E, Lonnebakk MT, Canciello G, Esposito G, Barbato E, De Luca N, Trimarco B, de Simone G. Development of Left Ventricular Hypertrophy in Treated Hypertensive Outpatients: The Campania Salute Network. *Hypertension.* 2017;69:136-142. doi: 10.1161/HYPERTENSIONAHA.116.08158
118. Jafar TH, Stark PC, Schmid CH, Landa M, Maschio G, de Jong PE, de Zeeuw D, Shahinfar S, Toto R, Levey AS, et al. Progression of chronic kidney disease: the role of blood pressure control, proteinuria, and angiotensin-converting enzyme inhibition: a patient-level meta-analysis. *Ann Intern Med.* 2003;139:244-252. doi: 10.7326/0003-4819-139-4-200308190-00006
119. Jamerson K, Weber MA, Bakris GL, Dahlof B, Pitt B, Shi V, Hester A, Gupte J, Gatlin M, Velazquez EJ, et al. Benazepril plus amlodipine or hydrochlorothiazide for hypertension in high-risk patients. *N Engl J Med.* 2008;359:2417-2428. doi: 10.1056/NEJMoa0806182
120. Julius S, Kjeldsen SE, Weber M, Brunner HR, Ekman S, Hansson L, Hua T, Laragh J, McInnes GT, Mitchell L, et al. Outcomes in hypertensive patients at high cardiovascular risk

- treated with regimens based on valsartan or amlodipine: the VALUE randomised trial. *Lancet*. 2004;363:2022-2031. doi: 10.1016/S0140-6736(04)16451-9
121. Julius S, Nesbitt SD, Egan BM, Weber MA, Michelson EL, Kaciroti N, Black HR, Grimm RH, Jr., Messerli FH, Oparil S, et al. Feasibility of treating prehypertension with an angiotensin-receptor blocker. *N Engl J Med*. 2006;354:1685-1697. doi: 10.1056/NEJMoa060838
122. Julius S, Palatini P, Kjeldsen SE, Zanchetti A, Weber MA, McInnes GT, Brunner HR, Mancia G, Schork MA, Hua TA, et al. Usefulness of heart rate to predict cardiac events in treated patients with high-risk systemic hypertension. *Am J Cardiol*. 2012;109:685-692. doi: 10.1016/j.amjcard.2011.10.025
123. Kjeldsen SE, Jamerson KA, Bakris GL, Pitt B, Dahlof B, Velazquez EJ, Gupte J, Staikos L, Hua TA, Shi V, et al. Predictors of blood pressure response to intensified and fixed combination treatment of hypertension: the ACCOMPLISH study. *Blood Press*. 2008;17:7-17. doi: 10.1080/08037050801972857
124. Kloner RA, Sowers JR, DiBona GF, Gaffney M, Wein M. Sex- and age-related antihypertensive effects of amlodipine. The Amlodipine Cardiovascular Community Trial Study Group. *Am J Cardiol*. 1996;77:713-722. doi: 10.1016/s0002-9149(97)89205-3
125. Kostis JB, Cabrera J, Cheng JQ, Cosgrove NM, Deng Y, Pressel SL, Davis BR. Association between chlorthalidone treatment of systolic hypertension and long-term survival. *JAMA*. 2011;306:2588-2593. doi: 10.1001/jama.2011.1821
126. Kostis JB, Davis BR, Cutler J, Grimm RH, Jr., Berge KG, Cohen JD, Lacy CR, Perry HM, Jr., Blaufox MD, Wassertheil-Smoller S, et al. Prevention of heart failure by antihypertensive drug treatment in older persons with isolated systolic hypertension. SHEP Cooperative Research Group. *JAMA*. 1997;278:212-216.
127. Kostis JB, Kim HJ, Rusnak J, Casale T, Kaplan A, Corren J, Levy E. Incidence and characteristics of angioedema associated with enalapril. *Arch Intern Med*. 2005;165:1637-1642. doi: 10.1001/archinte.165.14.1637
128. Kostis JB, Wilson AC, Freudenberger RS, Cosgrove NM, Pressel SL, Davis BR, Group SCR. Long-term effect of diuretic-based therapy on fatal outcomes in subjects with isolated systolic hypertension with and without diabetes. *Am J Cardiol*. 2005;95:29-35. doi: 10.1016/j.amjcard.2004.08.059
129. Kotseva K, Wood D, De Bacquer D, De Backer G, Ryden L, Jennings C, Gyberg V, Amouyel P, Bruthans J, Castro Conde A, et al. EUROASPIRE IV: A European Society of Cardiology survey on the lifestyle, risk factor and therapeutic management of coronary patients from 24 European countries. *Eur J Prev Cardiol*. 2016;23:636-648. doi: 10.1177/2047487315569401
130. Krieger EM, Drager LF, Giorgi DMA, Pereira AC, Barreto-Filho JAS, Nogueira AR, Mill JG, Lotufo PA, Amodeo C, Batista MC, et al. Spironolactone Versus Clonidine as a Fourth-Drug Therapy for Resistant Hypertension: The ReHOT Randomized Study (Resistant Hypertension Optimal Treatment). *Hypertension*. 2018;71:681-690. doi: 10.1161/HYPERTENSIONAHA.117.10662
131. Krum H, Schlaich MP, Sobotka PA, Bohm M, Mahfoud F, Rocha-Singh K, Katholi R, Esler MD. Percutaneous renal denervation in patients with treatment-resistant hypertension: final 3-year report of the Symplicity HTN-1 study. *Lancet*. 2014;383:622-629. doi: 10.1016/S0140-6736(13)62192-3
132. Kwon S, Thompson R, Florence M, Maier R, McIntyre L, Rogers T, Farrohki E, Whiteford M, Flum DR, Surgical C, et al. beta-blocker continuation after noncardiac surgery: a



- report from the surgical care and outcomes assessment program. *Arch Surg.* 2012;147:467-473. doi: 10.1001/archsurg.2011.1698
133. La Torre A, Giupponi G, Duffy D, Conca A, Catanzariti D. Sexual dysfunction related to drugs: a critical review. Part IV: cardiovascular drugs. *Pharmacopsychiatry.* 2015;48:1-6. doi: 10.1055/s-0034-1395515
134. Laurent S, Boutouyrie P, Vascular Mechanism C. Dose-dependent arterial destiffening and inward remodeling after olmesartan in hypertensives with metabolic syndrome. *Hypertension.* 2014;64:709-716. doi: 10.1161/HYPERTENSIONAHA.114.03282
135. Leenen FH, Nwachuku CE, Black HR, Cushman WC, Davis BR, Simpson LM, Alderman MH, Atlas SA, Basile JN, Cuyjet AB, et al. Clinical events in high-risk hypertensive patients randomly assigned to calcium channel blocker versus angiotensin-converting enzyme inhibitor in the antihypertensive and lipid-lowering treatment to prevent heart attack trial. *Hypertension.* 2006;48:374-384. doi: 10.1161/01.HYP.0000231662.77359.de
136. Leonardi-Bee J, Bath PM, Phillips SJ, Sandercock PA, Group ISTC. Blood pressure and clinical outcomes in the International Stroke Trial. *Stroke.* 2002;33:1315-1320. doi: 10.1161/01.str.0000014509.11540.66
137. Lewis CE, Grandits A, Flack J, McDonald R, Elmer PJ. Efficacy and tolerance of antihypertensive treatment in men and women with stage 1 diastolic hypertension. Results of the Treatment of Mild Hypertension Study. *Arch Intern Med.* 1996;156:377-385.
138. Liebson PR, Grandits GA, Dianzumba S, Prineas RJ, Grimm RH, Jr., Neaton JD, Stamler J. Comparison of five antihypertensive monotherapies and placebo for change in left ventricular mass in patients receiving nutritional-hygienic therapy in the Treatment of Mild Hypertension Study (TOMHS). *Circulation.* 1995;91:698-706. doi: 10.1161/01.cir.91.3.698
139. Lindenauer PK, Pekow P, Wang K, Mamidi DK, Gutierrez B, Benjamin EM. Perioperative beta-blocker therapy and mortality after major noncardiac surgery. *N Engl J Med.* 2005;353:349-361. doi: 10.1056/NEJMoa041895
140. Lithell H, Hansson L, Skoog I, Elmfeldt D, Hofman A, Olofsson B, Trenkwalder P, Zanchetti A, Group SS. The Study on Cognition and Prognosis in the Elderly (SCOPE): principal results of a randomized double-blind intervention trial. *J Hypertens.* 2003;21:875-886. doi: 10.1097/00004872-200305000-00011
141. Liu G, Zheng XX, Xu YL, Lu J, Hui RT, Huang XH. Effect of aldosterone antagonists on blood pressure in patients with resistant hypertension: a meta-analysis. *J Hum Hypertens.* 2015;29:159-166. doi: 10.1038/jhh.2014.64
142. Liu L, Wang JG, Gong L, Liu G, Staessen JA. Comparison of active treatment and placebo in older Chinese patients with isolated systolic hypertension. Systolic Hypertension in China (Syst-China) Collaborative Group. *J Hypertens.* 1998;16:1823-1829. doi: 10.1097/00004872-199816120-00016
143. Liu L, Wang Z, Gong L, Zhang Y, Thijs L, Staessen JA, Wang J. Blood pressure reduction for the secondary prevention of stroke: a Chinese trial and a systematic review of the literature. *Hypertens Res.* 2009;32:1032-1040. doi: 10.1038/hr.2009.139
144. Liu L, Xu B, Ju Y. Addition of spironolactone in patients with resistant hypertension: A meta-analysis of randomized controlled trials. *Clin Exp Hypertens.* 2017;39:257-263. doi: 10.1080/10641963.2016.1246564
145. Liu L, Zhang Y, Liu G, Li W, Zhang X, Zanchetti A, Group FS. The Felodipine Event Reduction (FEVER) Study: a randomized long-term placebo-controlled trial in Chinese

hypertensive patients. *J Hypertens*. 2005;23:2157-2172. doi: 10.1097/01.hjh.0000194120.42722.ac

146. Lobo MD, Sobotka PA, Stanton A, Cockcroft JR, Sulke N, Dolan E, van der Giet M, Hoyer J, Furniss SS, Foran JP, et al. Central arteriovenous anastomosis for the treatment of patients with uncontrolled hypertension (the ROX CONTROL HTN study): a randomised controlled trial. *Lancet*. 2015;385:1634-1641. doi: 10.1016/S0140-6736(14)62053-5

147. London MJ, Hur K, Schwartz GG, Henderson WG. Association of perioperative beta-blockade with mortality and cardiovascular morbidity following major noncardiac surgery. *JAMA*. 2013;309:1704-1713. doi: 10.1001/jama.2013.4135

148. Lonn EM, Bosch J, Lopez-Jaramillo P, Zhu J, Liu L, Pais P, Diaz R, Xavier D, Sliwa K, Dans A, et al. Blood-Pressure Lowering in Intermediate-Risk Persons without Cardiovascular Disease. *N Engl J Med*. 2016;374:2009-2020. doi: 10.1056/NEJMoal600175

149. Lonnebakk MT, Izzo R, Mancusi C, Gerdtz E, Losi MA, Canciello G, Giugliano G, De Luca N, Trimarco B, de Simone G. Left Ventricular Hypertrophy Regression During Antihypertensive Treatment in an Outpatient Clinic (the Campania Salute Network). *J Am Heart Assoc*. 2017;6. doi: 10.1161/JAHA.116.004152

150. Luders S, Schrader J, Berger J, Unger T, Zidek W, Bohm M, Middeke M, Motz W, Lubcke C, Gansz A, et al. The PHARAO study: prevention of hypertension with the angiotensin-converting enzyme inhibitor ramipril in patients with high-normal blood pressure: a prospective, randomized, controlled prevention trial of the German Hypertension League. *J Hypertens*. 2008;26:1487-1496. doi: 10.1097/HJH.0b013e3282ff8864

151. MacDonald TM, Williams B, Webb DJ, Morant S, Caulfield M, Cruickshank JK, Ford I, Sever P, Mackenzie IS, Padmanabhan S, et al. Combination Therapy Is Superior to Sequential Monotherapy for the Initial Treatment of Hypertension: A Double-Blind Randomized Controlled Trial. *J Am Heart Assoc*. 2017;6. doi: 10.1161/JAHA.117.006986

152. Makai P, IntHout J, Deinum J, Jenniskens K, Wilt GJV. A Network Meta-Analysis of Clinical Management Strategies for Treatment-Resistant Hypertension: Making Optimal Use of the Evidence. *J Gen Intern Med*. 2017;32:921-930. doi: 10.1007/s11606-017-4000-7

153. Mancia G, Facchetti R, Parati G, Zanchetti A. Effect of long-term antihypertensive treatment on white-coat hypertension. *Hypertension*. 2014;64:1388-1398. doi: 10.1161/HYPERTENSIONAHA.114.04278

154. Mancia G, Kjeldsen SE, Zappe DH, Holzhauer B, Hua TA, Zanchetti A, Julius S, Weber MA. Cardiovascular outcomes at different on-treatment blood pressures in the hypertensive patients of the VALUE trial. *Eur Heart J*. 2016;37:955-964. doi: 10.1093/eurheartj/ehv633

155. Mancia G, Parati G, Bilo G, Gao P, Fagard R, Redon J, Czuriga I, Polak M, Ribeiro JM, Sanchez R, et al. Ambulatory blood pressure values in the Ongoing Telmisartan Alone and in Combination with Ramipril Global Endpoint Trial (ONTARGET). *Hypertension*. 2012;60:1400-1406. doi: 10.1161/HYPERTENSIONAHA.112.199562

156. Mancia G, Schumacher H, Redon J, Verdecchia P, Schmieder R, Jennings G, Yusoff K, Ryden L, Liu GL, Teo K, et al. Blood pressure targets recommended by guidelines and incidence of cardiovascular and renal events in the Ongoing Telmisartan Alone and in Combination With Ramipril Global Endpoint Trial (ONTARGET). *Circulation*. 2011;124:1727-1736. doi: 10.1161/CIRCULATIONAHA.110.008870

157. Manning LS, Mistri AK, Potter J, Rothwell PM, Robinson TG. Short-term blood pressure variability in acute stroke: post hoc analysis of the controlling hypertension and hypotension

- immediately post stroke and continue or stop post-stroke antihypertensives collaborative study trials. *Stroke*. 2015;46:1518-1524. doi: 10.1161/STROKEAHA.115.009078
158. Margolis KL, O'Connor PJ, Morgan TM, Buse JB, Cohen RM, Cushman WC, Cutler JA, Evans GW, Gerstein HC, Grimm RH, Jr., et al. Outcomes of combined cardiovascular risk factor management strategies in type 2 diabetes: the ACCORD randomized trial. *Diabetes Care*. 2014;37:1721-1728. doi: 10.2337/dc13-2334
159. Margolis KL, Piller LB, Ford CE, Henriquez MA, Cushman WC, Einhorn PT, Colon PJ, Sr., Vidt DG, Christian R, Wong ND, et al. Blood pressure control in Hispanics in the antihypertensive and lipid-lowering treatment to prevent heart attack trial. *Hypertension*. 2007;50:854-861. doi: 10.1161/HYPERTENSIONAHA.107.092650
160. Marin R, Ruilope LM, Aljama P, Aranda P, Segura J, Diez J, Investigators of the ESEdtaSlPdIIRepnd. A random comparison of fosinopril and nifedipine GITS in patients with primary renal disease. *J Hypertens*. 2001;19:1871-1876. doi: 10.1097/00004872-200110000-00023
161. Massie BM, Carson PE, McMurray JJ, Komajda M, McKelvie R, Zile MR, Anderson S, Donovan M, Iverson E, Staiger C, et al. Irbesartan in patients with heart failure and preserved ejection fraction. *N Engl J Med*. 2008;359:2456-2467. doi: 10.1056/NEJMoa0805450
162. Matsuzaki M, Ogihara T, Umemoto S, Rakugi H, Matsuoka H, Shimada K, Abe K, Suzuki N, Eto T, Higaki J, et al. Prevention of cardiovascular events with calcium channel blocker-based combination therapies in patients with hypertension: a randomized controlled trial. *J Hypertens*. 2011;29:1649-1659. doi: 10.1097/HJH.0b013e328348345d
163. McManus RJ, Mant J, Haque MS, Bray EP, Bryan S, Greenfield SM, Jones MI, Jowett S, Little P, Penaloza C, et al. Effect of self-monitoring and medication self-titration on systolic blood pressure in hypertensive patients at high risk of cardiovascular disease: the TASMINE-SR randomized clinical trial. *JAMA*. 2014;312:799-808. doi: 10.1001/jama.2014.10057
164. McMurray JJ, Packer M, Desai AS, Gong J, Lefkowitz MP, Rizkala AR, Rouleau JL, Shi VC, Solomon SD, Swedberg K, et al. Angiotensin-neprilysin inhibition versus enalapril in heart failure. *N Engl J Med*. 2014;371:993-1004. doi: 10.1056/NEJMoa1409077
165. Mehanna M, Gong Y, McDonough CW, Beitelshes AL, Gums JG, Chapman AB, Schwartz GL, Johnson JA, Turner ST, Cooper-DeHoff RM. Blood pressure response to metoprolol and chlorthalidone in European and African Americans with hypertension. *J Clin Hypertens (Greenwich)*. 2017;19:1301-1308. doi: 10.1111/jch.13094
166. Neaton JD, Grimm RH, Jr., Prineas RJ, Stamler J, Grandits GA, Elmer PJ, Cutler JA, Flack JM, Schoenberger JA, McDonald R, et al. Treatment of Mild Hypertension Study. Final results. Treatment of Mild Hypertension Study Research Group. *JAMA*. 1993;270:713-724.
167. Ninomiya T, Zoungas S, Neal B, Woodward M, Patel A, Perkovic V, Cass A, Cooper M, Grobbee D, Hamet P, et al. Efficacy and safety of routine blood pressure lowering in older patients with diabetes: results from the ADVANCE trial. *J Hypertens*. 2010;28:1141-1149.
168. Officers A, Coordinators for the ACRGTA, Lipid-Lowering Treatment to Prevent Heart Attack T. Major outcomes in high-risk hypertensive patients randomized to angiotensin-converting enzyme inhibitor or calcium channel blocker vs diuretic: The Antihypertensive and Lipid-Lowering Treatment to Prevent Heart Attack Trial (ALLHAT). *JAMA*. 2002;288:2981-2997. doi: 10.1001/jama.288.23.2981
169. Ogedegbe G, Shah NR, Phillips C, Goldfeld K, Roy J, Guo Y, Gyamfi J, Torgersen C, Capponi L, Bangalore S. Comparative Effectiveness of Angiotensin-Converting Enzyme

- Inhibitor-Based Treatment on Cardiovascular Outcomes in Hypertensive Blacks Versus Whites. *J Am Coll Cardiol.* 2015;66:1224-1233. doi: 10.1016/j.jacc.2015.07.021
170. Ogihara T, Saruta T, Rakugi H, Saito I, Shimamoto K, Matsuoka H, Teramukai S, Higaki J, Ito S, Shimada K, et al. Combination therapy of hypertension in the elderly: a subgroup analysis of the Combination of OLMesartan and a calcium channel blocker or diuretic in Japanese elderly hypertensive patients trial. *Hypertens Res.* 2015;38:89-96. doi: 10.1038/hr.2014.144
171. Ojji DB, Mayosi B, Francis V, Badri M, Cornelius V, Smythe W, Kramer N, Barasa F, Damasceno A, Dzudie A, et al. Comparison of Dual Therapies for Lowering Blood Pressure in Black Africans. *N Engl J Med.* 2019;380:2429-2439. doi: 10.1056/NEJMoa1901113
172. Okin PM, Oikarinen L, Viitasalo M, Toivonen L, Kjeldsen SE, Nieminen MS, Edelman JM, Dahlof B, Devereux RB, Investigators LS. Prognostic value of changes in the electrocardiographic strain pattern during antihypertensive treatment: the Losartan Intervention for End-Point Reduction in Hypertension Study (LIFE). *Circulation.* 2009;119:1883-1891. doi: 10.1161/CIRCULATIONAHA.108.812313
173. Olde Engberink RH, Frenkel WJ, van den Bogaard B, Brewster LM, Vogt L, van den Born BJ. Effects of thiazide-type and thiazide-like diuretics on cardiovascular events and mortality: systematic review and meta-analysis. *Hypertension.* 2015;65:1033-1040. doi: 10.1161/HYPERTENSIONAHA.114.05122
174. Ong KT, Delorme S, Pannier B, Safar ME, Benetos A, Laurent S, Boutouyrie P, investigators. Aortic stiffness is reduced beyond blood pressure lowering by short-term and long-term antihypertensive treatment: a meta-analysis of individual data in 294 patients. *J Hypertens.* 2011;29:1034-1042. doi: 10.1097/HJH.0b013e328346a583
175. Ostergren J, Sleight P, Dagenais G, Danisa K, Bosch J, Qilong Y, Yusuf S, investigators Hs. Impact of ramipril in patients with evidence of clinical or subclinical peripheral arterial disease. *Eur Heart J.* 2004;25:17-24. doi: 10.1016/j.ehj.2003.10.033
176. Oxlund CS, Henriksen JE, Tarnow L, Schousboe K, Gram J, Jacobsen IA. Low dose spironolactone reduces blood pressure in patients with resistant hypertension and type 2 diabetes mellitus: a double blind randomized clinical trial. *J Hypertens.* 2013;31:2094-2102. doi: 10.1097/HJH.0b013e3283638b1a
177. Parving HH, Brenner BM, McMurray JJ, de Zeeuw D, Haffner SM, Solomon SD, Chaturvedi N, Persson F, Desai AS, Nicolaidis M, et al. Cardiorenal end points in a trial of aliskiren for type 2 diabetes. *N Engl J Med.* 2012;367:2204-2213. doi: 10.1056/NEJMoa1208799
178. Patel A, Group AC, MacMahon S, Chalmers J, Neal B, Woodward M, Billot L, Harrap S, Poulter N, Marre M, et al. Effects of a fixed combination of perindopril and indapamide on macrovascular and microvascular outcomes in patients with type 2 diabetes mellitus (the ADVANCE trial): a randomised controlled trial. *Lancet.* 2007;370:829-840. doi: 10.1016/S0140-6736(07)61303-8
179. Peacock WF, Chandra A, Char D, Collins S, Der Sahakian G, Ding L, Dunbar L, Fermann G, Fonarow GC, Garrison N, et al. Clevidipine in acute heart failure: Results of the A Study of Blood Pressure Control in Acute Heart Failure-A Pilot Study (PRONTO). *Am Heart J.* 2014;167:529-536. doi: 10.1016/j.ahj.2013.12.023
180. Peacock WF, Varon J, Baumann BM, Borczuk P, Cannon CM, Chandra A, Cline DM, Diercks D, Hiestand B, Hsu A, et al. CLUE: a randomized comparative effectiveness trial of IV nicardipine versus labetalol use in the emergency department. *Crit Care.* 2011;15:R157. doi: 10.1186/cc10289

181. Pedrosa RP, Drager LF, de Paula LKG, Amaro ACS, Bortolotto LA, Lorenzi-Filho G. Effects of OSA treatment on BP in patients with resistant hypertension: a randomized trial. *Chest*. 2013;144:1487-1494. doi: 10.1378/chest.13-0085
182. Pepine CJ, Handberg EM, Cooper-DeHoff RM, Marks RG, Kowey P, Messerli FH, Mancina G, Cangiano JL, Garcia-Barreto D, Keltai M, et al. A calcium antagonist vs a non-calcium antagonist hypertension treatment strategy for patients with coronary artery disease. The International Verapamil-Trandolapril Study (INVEST): a randomized controlled trial. *JAMA*. 2003;290:2805-2816. doi: 10.1001/jama.290.21.2805
183. Persson F, Lewis JB, Lewis EJ, Rossing P, Hollenberg NK, Parving HH. Aliskiren in combination with losartan reduces albuminuria independent of baseline blood pressure in patients with type 2 diabetes and nephropathy. *Clin J Am Soc Nephrol*. 2011;6:1025-1031. doi: 10.2215/CJN.07590810
184. Peters R, Beckett N, Forette F, Tuomilehto J, Clarke R, Ritchie C, Waldman A, Walton I, Poulter R, Ma S, et al. Incident dementia and blood pressure lowering in the Hypertension in the Very Elderly Trial cognitive function assessment (HYVET-COG): a double-blind, placebo controlled trial. *Lancet Neurol*. 2008;7:683-689. doi: 10.1016/S1474-4422(08)70143-1
185. Pfeffer MA, Braunwald E, Moye LA, Basta L, Brown EJ, Jr., Cuddy TE, Davis BR, Geltman EM, Goldman S, Flaker GC, et al. Effect of captopril on mortality and morbidity in patients with left ventricular dysfunction after myocardial infarction. Results of the survival and ventricular enlargement trial. The SAVE Investigators. *N Engl J Med*. 1992;327:669-677. doi: 10.1056/NEJM199209033271001
186. Pfeffer MA, McMurray JJ, Velazquez EJ, Rouleau JL, Kober L, Maggioni AP, Solomon SD, Swedberg K, Van de Werf F, White H, et al. Valsartan, captopril, or both in myocardial infarction complicated by heart failure, left ventricular dysfunction, or both. *N Engl J Med*. 2003;349:1893-1906. doi: 10.1056/NEJMoa032292
187. Pickering TG, Levenstein M, Walmsley P. Differential effects of doxazosin on clinic and ambulatory pressure according to age, gender, and presence of white coat hypertension. Results of the HALT Study. Hypertension and Lipid Trial Study Group. *Am J Hypertens*. 1994;7:848-852. doi: 10.1093/ajh/7.9.848
188. Piller LB, Baraniuk S, Simpson LM, Cushman WC, Massie BM, Einhorn PT, Oparil S, Ford CE, Graumlich JF, Dart RA, et al. Long-term follow-up of participants with heart failure in the antihypertensive and lipid-lowering treatment to prevent heart attack trial (ALLHAT). *Circulation*. 2011;124:1811-1818. doi: 10.1161/CIRCULATIONAHA.110.012575
189. Piller LB, Simpson LM, Baraniuk S, Habib GB, Rahman M, Basile JN, Dart RA, Ellsworth AJ, Fendley H, Probstfield JL, et al. Characteristics and long-term follow-up of participants with peripheral arterial disease during ALLHAT. *J Gen Intern Med*. 2014;29:1475-1483. doi: 10.1007/s11606-014-2947-1
190. Redon J, Mancina G, Sleight P, Schumacher H, Gao P, Pogue J, Fagard R, Verdecchia P, Weber M, Bohm M, et al. Safety and efficacy of low blood pressures among patients with diabetes: subgroup analyses from the ONTARGET (ONGOing Telmisartan Alone and in combination with Ramipril Global Endpoint Trial). *J Am Coll Cardiol*. 2012;59:74-83. doi: 10.1016/j.jacc.2011.09.040
191. Robinson TG, Potter JF, Ford GA, Bulpitt CJ, Chernova J, Jagger C, James MA, Knight J, Markus HS, Mistri AK, et al. Effects of antihypertensive treatment after acute stroke in the Continue or Stop Post-Stroke Antihypertensives Collaborative Study (COSSACS): a prospective,

- randomised, open, blinded-endpoint trial. *Lancet Neurol.* 2010;9:767-775. doi: 10.1016/S1474-4422(10)70163-0
192. Rodilla E, Costa JA, Perez-Lahiguera F, Baldo E, Gonzalez C, Pascual JM. Spironolactone and doxazosin treatment in patients with resistant hypertension. *Rev Esp Cardiol.* 2009;62:158-166. doi: 10.1016/s1885-5857(09)71534-8
193. Rosa J, Widimsky P, Tousek P, Petrak O, Curila K, Waldauf P, Bednar F, Zelinka T, Holaj R, Strauch B, et al. Randomized comparison of renal denervation versus intensified pharmacotherapy including spironolactone in true-resistant hypertension: six-month results from the Prague-15 study. *Hypertension.* 2015;65:407-413. doi: 10.1161/HYPERTENSIONAHA.114.04019
194. Rosa J, Widimsky P, Waldauf P, Lambert L, Zelinka T, Taborsky M, Branny M, Tousek P, Petrak O, Curila K, et al. Role of Adding Spironolactone and Renal Denervation in True Resistant Hypertension: One-Year Outcomes of Randomized PRAGUE-15 Study. *Hypertension.* 2016;67:397-403. doi: 10.1161/HYPERTENSIONAHA.115.06526
195. Roshanov PS, Rochweg B, Patel A, Salehian O, Duceppe E, Belley-Cote EP, Guyatt GH, Sessler DI, Le Manach Y, Borges FK, et al. Withholding versus Continuing Angiotensin-converting Enzyme Inhibitors or Angiotensin II Receptor Blockers before Noncardiac Surgery: An Analysis of the Vascular events In noncardiac Surgery patients cOhort evaluationN Prospective Cohort. *Anesthesiology.* 2017;126:16-27. doi: 10.1097/ALN.0000000000001404
196. Ruggenti P, Perna A, Loriga G, Ganeva M, Ene-Iordache B, Turturro M, Lesti M, Peticucci E, Chakarski IN, Leonardis D, et al. Blood-pressure control for renoprotection in patients with non-diabetic chronic renal disease (REIN-2): multicentre, randomised controlled trial. *Lancet.* 2005;365:939-946. doi: 10.1016/S0140-6736(05)71082-5
197. Rutten FH, Zuithoff NP, Hak E, Grobbee DE, Hoes AW. Beta-blockers may reduce mortality and risk of exacerbations in patients with chronic obstructive pulmonary disease. *Arch Intern Med.* 2010;170:880-887. doi: 10.1001/archinternmed.2010.112
198. Sakamoto Y, Koga M, Yamagami H, Okuda S, Okada Y, Kimura K, Shiokawa Y, Nakagawara J, Furui E, Hasegawa Y, et al. Systolic blood pressure after intravenous antihypertensive treatment and clinical outcomes in hyperacute intracerebral hemorrhage: the stroke acute management with urgent risk-factor assessment and improvement-intracerebral hemorrhage study. *Stroke.* 2013;44:1846-1851. doi: 10.1161/STROKEAHA.113.001212
199. Salpeter SR, Buckley NS, Ormiston TM, Salpeter EE. Meta-analysis: effect of long-acting beta-agonists on severe asthma exacerbations and asthma-related deaths. *Ann Intern Med.* 2006;144:904-912. doi: 10.7326/0003-4819-144-12-200606200-00126
200. Sandset EC, Bath PM, Boysen G, Jatuzis D, Korv J, Luders S, Murray GD, Richter PS, Roine RO, Terent A, et al. The angiotensin-receptor blocker candesartan for treatment of acute stroke (SCAST): a randomised, placebo-controlled, double-blind trial. *Lancet.* 2011;377:741-750. doi: 10.1016/S0140-6736(11)60104-9
201. Sandset EC, Murray GD, Bath PM, Kjeldsen SE, Berge E, Scandinavian Candesartan Acute Stroke Trial Study G. Relation between change in blood pressure in acute stroke and risk of early adverse events and poor outcome. *Stroke.* 2012;43:2108-2114. doi: 10.1161/STROKEAHA.111.647362
202. Saunders E, Weir MR, Kong BW, Hollifield J, Gray J, Vertes V, Sowers JR, Zemel MB, Curry C, Schoenberger J, et al. A comparison of the efficacy and safety of a beta-blocker, a calcium channel blocker, and a converting enzyme inhibitor in hypertensive blacks. *Arch Intern Med.* 1990;150:1707-1713.

203. Sawicki PT, Muhlhauser I, Didjurgeit U, Baumgartner A, Bender R, Berger M. Intensified antihypertensive therapy is associated with improved survival in type 1 diabetic patients with nephropathy. *J Hypertens*. 1995;13:933-938. doi: 10.1097/00004872-199508000-00015
204. Schmidt M, Mansfield KE, Bhaskaran K, Nitsch D, Sorensen HT, Smeeth L, Tomlinson LA. Serum creatinine elevation after renin-angiotensin system blockade and long term cardiorenal risks: cohort study. *BMJ*. 2017;356:j791. doi: 10.1136/bmj.j791
205. Schmieder RE, Kjeldsen SE, Julius S, McInnes GT, Zanchetti A, Hua TA, Group VT. Reduced incidence of new-onset atrial fibrillation with angiotensin II receptor blockade: the VALUE trial. *J Hypertens*. 2008;26:403-411. doi: 10.1097/HJH.0b013e3282f35c67
206. Schneider A, Schwab J, Karg MV, Kalizki T, Reinold A, Schneider MP, Schmieder RE, Schmidt BM. Low-dose eplerenone decreases left ventricular mass in treatment-resistant hypertension. *J Hypertens*. 2017;35:1086-1092. doi: 10.1097/HJH.0000000000001264
207. Scognamiglio R, Rahimtoola SH, Fasoli G, Nistri S, Dalla Volta S. Nifedipine in asymptomatic patients with severe aortic regurgitation and normal left ventricular function. *N Engl J Med*. 1994;331:689-694. doi: 10.1056/NEJM199409153311101
208. Shahin Y, Khan JA, Chetter I. Angiotensin converting enzyme inhibitors effect on arterial stiffness and wave reflections: a meta-analysis and meta-regression of randomised controlled trials. *Atherosclerosis*. 2012;221:18-33. doi: 10.1016/j.atherosclerosis.2011.12.005
209. Shores J, Berger KR, Murphy EA, Pyeritz RE. Progression of aortic dilatation and the benefit of long-term beta-adrenergic blockade in Marfan's syndrome. *N Engl J Med*. 1994;330:1335-1341. doi: 10.1056/NEJM199405123301902
210. Sinnott SJ, Tomlinson LA, Root AA, Mathur R, Mansfield KE, Smeeth L, Douglas IJ. Comparative effectiveness of fourth-line anti-hypertensive agents in resistant hypertension: A systematic review and meta-analysis. *Eur J Prev Cardiol*. 2017;24:228-238. doi: 10.1177/2047487316675194
211. Sleight P, Redon J, Verdecchia P, Mancina G, Gao P, Fagard R, Schumacher H, Weber M, Bohm M, Williams B, et al. Prognostic value of blood pressure in patients with high vascular risk in the Ongoing Telmisartan Alone and in combination with Ramipril Global Endpoint Trial study. *J Hypertens*. 2009;27:1360-1369. doi: 10.1097/HJH.0b013e32832d7370
212. Spiering W, Williams B, Van der Heyden J, van Kleef M, Lo R, Versmissen J, Moelker A, Kroon A, Reuter H, Ansel G, et al. Endovascular baroreflex amplification for resistant hypertension: a safety and proof-of-principle clinical study. *Lancet*. 2017;390:2655-2661. doi: 10.1016/S0140-6736(17)32337-1
213. Staessen JA, Den Hond E, Celis H, Fagard R, Keary L, Vandenhoven G, O'Brien ET. Treatment of Hypertension Based on Home or Office Blood Pressure Trial I. Antihypertensive treatment based on blood pressure measurement at home or in the physician's office: a randomized controlled trial. *JAMA*. 2004;291:955-964. doi: 10.1001/jama.291.8.955
214. Staessen JA, Fagard R, Thijs L, Celis H, Arabidze GG, Birkenhager WH, Bulpitt CJ, de Leeuw PW, Dollery CT, Fletcher AE, et al. Randomised double-blind comparison of placebo and active treatment for older patients with isolated systolic hypertension. The Systolic Hypertension in Europe (Syst-Eur) Trial Investigators. *Lancet*. 1997;350:757-764. doi: 10.1016/s0140-6736(97)05381-6
215. Stergiou GS, Makris T, Papavasiliou M, Efstathiou S, Manolis A. Comparison of antihypertensive effects of an angiotensin-converting enzyme inhibitor, a calcium antagonist and

- a diuretic in patients with hypertension not controlled by angiotensin receptor blocker monotherapy. *J Hypertens*. 2005;23:883-889. doi: 10.1097/01.hjh.0000163159.22116.ab
216. Sundstrom J, Arima H, Jackson R, Turnbull F, Rahimi K, Chalmers J, Woodward M, Neal B, Blood Pressure Lowering Treatment Trialists C. Effects of blood pressure reduction in mild hypertension: a systematic review and meta-analysis. *Ann Intern Med*. 2015;162:184-191. doi: 10.7326/M14-0773
217. Suzuki T, Isselbacher EM, Nienaber CA, Pyeritz RE, Eagle KA, Tsai TT, Cooper JV, Januzzi JL, Jr., Braverman AC, Montgomery DG, et al. Type-selective benefits of medications in treatment of acute aortic dissection (from the International Registry of Acute Aortic Dissection [IRAD]). *Am J Cardiol*. 2012;109:122-127. doi: 10.1016/j.amjcard.2011.08.012
218. Swedberg K, Zannad F, McMurray JJ, Krum H, van Veldhuisen DJ, Shi H, Vincent J, Pitt B, Investigators E-HS. Eplerenone and atrial fibrillation in mild systolic heart failure: results from the EMPHASIS-HF (Eplerenone in Mild Patients Hospitalization And Survival Study in Heart Failure) study. *J Am Coll Cardiol*. 2012;59:1598-1603. doi: 10.1016/j.jacc.2011.11.063
219. Taler SJ, Textor SC, Augustine JE. Resistant hypertension: comparing hemodynamic management to specialist care. *Hypertension*. 2002;39:982-988. doi: 10.1161/01.hyp.0000016176.16042.2f
220. Tarnow L, Rossing P, Jensen C, Hansen BV, Parving HH. Long-term renoprotective effect of nisoldipine and lisinopril in type 1 diabetic patients with diabetic nephropathy. *Diabetes Care*. 2000;23:1725-1730. doi: 10.2337/diacare.23.12.1725
221. Tataru AP, Barry AR. A Systematic Review of Add-on Pharmacologic Therapy in the Treatment of Resistant Hypertension. *Am J Cardiovasc Drugs*. 2017;17:311-318. doi: 10.1007/s40256-017-0224-5
222. Thompson AM, Hu T, Eshelbrenner CL, Reynolds K, He J, Bazzano LA. Antihypertensive treatment and secondary prevention of cardiovascular disease events among persons without hypertension: a meta-analysis. *JAMA*. 2011;305:913-922. doi: 10.1001/jama.2011.250
223. Tinetti ME, Han L, Lee DS, McAvay GJ, Peduzzi P, Gross CP, Zhou B, Lin H. Antihypertensive medications and serious fall injuries in a nationally representative sample of older adults. *JAMA Intern Med*. 2014;174:588-595. doi: 10.1001/jamainternmed.2013.14764
224. Toschke AM, Gulliford MC, Wolfe CD, Rudd AG, Heuschmann PU. Antihypertensive treatment after first stroke in primary care: results from the General Practitioner Research Database. *J Hypertens*. 2011;29:154-160. doi: 10.1097/HJH.0b013e32833f3897
225. Turan A, You J, Shiba A, Kurz A, Saager L, Sessler DI. Angiotensin converting enzyme inhibitors are not associated with respiratory complications or mortality after noncardiac surgery. *Anesth Analg*. 2012;114:552-560. doi: 10.1213/ANE.0b013e318241f6af
226. Turnbull F, Neal B, Algert C, Chalmers J, Chapman N, Cutler J, Woodward M, MacMahon S, Blood Pressure Lowering Treatment Trialists C. Effects of different blood pressure-lowering regimens on major cardiovascular events in individuals with and without diabetes mellitus: results of prospectively designed overviews of randomized trials. *Arch Intern Med*. 2005;165:1410-1419. doi: 10.1001/archinte.165.12.1410
227. Turnbull F, Woodward M, Neal B, Barzi F, Ninomiya T, Chalmers J, Perkovic V, Li N, MacMahon S, Blood Pressure Lowering Treatment Trialists C. Do men and women respond differently to blood pressure-lowering treatment? Results of prospectively designed overviews of randomized trials. *Eur Heart J*. 2008;29:2669-2680. doi: 10.1093/eurheartj/ehn427



228. Tveit A, Grundvold I, Olufsen M, Seljeflot I, Abdelnoor M, Arnesen H, Smith P. Candesartan in the prevention of relapsing atrial fibrillation. *Int J Cardiol.* 2007;120:85-91. doi: 10.1016/j.ijcard.2006.08.086
229. Tzourio C, Anderson C, Chapman N, Woodward M, Neal B, MacMahon S, Chalmers J, Group PC. Effects of blood pressure lowering with perindopril and indapamide therapy on dementia and cognitive decline in patients with cerebrovascular disease. *Arch Intern Med.* 2003;163:1069-1075. doi: 10.1001/archinte.163.9.1069
230. Vagholkar S, Zwar N, Jayasinghe UW, Denney-Wilson E, Patel A, Campbell T, Harris MF. Influence of cardiovascular absolute risk assessment on prescribing of antihypertensive and lipid-lowering medications: a cluster randomized controlled trial. *Am Heart J.* 2014;167:28-35. doi: 10.1016/j.ahj.2013.10.002
231. van der Leeuw J, Visseren FL, Woodward M, Zoungas S, Kengne AP, van der Graaf Y, Glasziou P, Hamet P, MacMahon S, Poulter N, et al. Predicting the effects of blood pressure-lowering treatment on major cardiovascular events for individual patients with type 2 diabetes mellitus: results from Action in Diabetes and Vascular Disease: Preterax and Diamicron MR Controlled Evaluation. *Hypertension.* 2015;65:115-121. doi: 10.1161/HYPERTENSIONAHA.114.04421
232. van der Sande NGC, de Beus E, Bots ML, Voskuil M, Blankestijn PJ, Visseren F, Spiering W, group Ss. Apparent resistant hypertension and the risk of vascular events and mortality in patients with manifest vascular disease. *J Hypertens.* 2018;36:143-150. doi: 10.1097/HJH.0000000000001494
233. van Dieren S, Kengne AP, Chalmers J, Beulens JW, Cooper ME, Grobbee DE, Harrap S, Mancia G, Neal B, Patel A, et al. Effects of blood pressure lowering on cardiovascular outcomes in different cardiovascular risk groups among participants with type 2 diabetes. *Diabetes Res Clin Pract.* 2012;98:83-90. doi: 10.1016/j.diabres.2012.05.002
234. van Veldhuisen DJ, Cohen-Solal A, Bohm M, Anker SD, Babalis D, Roughton M, Coats AJ, Poole-Wilson PA, Flather MD, Investigators S. Beta-blockade with nebivolol in elderly heart failure patients with impaired and preserved left ventricular ejection fraction: Data From SENIORS (Study of Effects of Nebivolol Intervention on Outcomes and Rehospitalization in Seniors With Heart Failure). *J Am Coll Cardiol.* 2009;53:2150-2158. doi: 10.1016/j.jacc.2009.02.046
235. Varon J, Soto-Ruiz KM, Baumann BM, Borczuk P, Cannon CM, Chandra A, Cline DM, Diercks DB, Hiestand B, Hsu A, et al. The management of acute hypertension in patients with renal dysfunction: labetalol or nicardipine? *Postgrad Med.* 2014;126:124-130. doi: 10.3810/pgm.2014.07.2790
236. Verdecchia P, Dagenais G, Healey J, Gao P, Dans AL, Chazova I, Binbrek AS, Iacobellis G, Ferreira R, Holwerda N, et al. Blood pressure and other determinants of new-onset atrial fibrillation in patients at high cardiovascular risk in the Ongoing Telmisartan Alone and in Combination With Ramipril Global Endpoint Trial/Telmisartan Randomized Assessment Study in ACE iNtolerant subjects with cardiovascular Disease studies. *J Hypertens.* 2012;30:1004-1014. doi: 10.1097/HJH.0b013e3283522a51
237. Verma AA, Khuu W, Tadrous M, Gomes T, Mamdani MM. Fixed-dose combination antihypertensive medications, adherence, and clinical outcomes: A population-based retrospective cohort study. *PLoS Med.* 2018;15:e1002584. doi: 10.1371/journal.pmed.1002584
238. Vermes E, Tardif JC, Bourassa MG, Racine N, Levesque S, White M, Guerra PG, Ducharme A. Enalapril decreases the incidence of atrial fibrillation in patients with left

- ventricular dysfunction: insight from the Studies Of Left Ventricular Dysfunction (SOLVD) trials. *Circulation*. 2003;107:2926-2931. doi: 10.1161/01.CIR.0000072793.81076.D4
239. Volpe M, Christian Rump L, Ammentorp B, Laeis P. Efficacy and safety of triple antihypertensive therapy with the olmesartan/amlodipine/hydrochlorothiazide combination. *Clin Drug Investig*. 2012;32:649-664. doi: 10.1007/BF03261919
240. Vrijens B, Vincze G, Kristanto P, Urquhart J, Burnier M. Adherence to prescribed antihypertensive drug treatments: longitudinal study of electronically compiled dosing histories. *BMJ*. 2008;336:1114-1117. doi: 10.1136/bmj.39553.670231.25
241. Wachtell K, Lehto M, Gerds E, Olsen MH, Hornestam B, Dahlof B, Ibsen H, Julius S, Kjeldsen SE, Lindholm LH, et al. Angiotensin II receptor blockade reduces new-onset atrial fibrillation and subsequent stroke compared to atenolol: the Losartan Intervention For End Point Reduction in Hypertension (LIFE) study. *J Am Coll Cardiol*. 2005;45:712-719. doi: 10.1016/j.jacc.2004.10.068
242. Walker PR, Marshall AJ, Farr S, Bauminger B, Walters G, Barritt DW. Abrupt withdrawal of atenolol in patients with severe angina. Comparison with the effects of treatment. *Br Heart J*. 1985;53:276-282. doi: 10.1136/hrt.53.3.276
243. Wallace AW, Au S, Cason BA. Association of the pattern of use of perioperative beta-blockade and postoperative mortality. *Anesthesiology*. 2010;113:794-805. doi: 10.1097/ALN.0b013e3181f1c061
244. Wang C, Xiong B, Huang J. Efficacy and Safety of Spironolactone in Patients with Resistant Hypertension: A Meta-analysis of Randomised Controlled Trials. *Heart Lung Circ*. 2016;25:1021-1030. doi: 10.1016/j.hlc.2016.02.016
245. Wang JG, Staessen JA, Gong L, Liu L. Chinese trial on isolated systolic hypertension in the elderly. Systolic Hypertension in China (Syst-China) Collaborative Group. *Arch Intern Med*. 2000;160:211-220. doi: 10.1001/archinte.160.2.211
246. Wang JG, Staessen JA, Li Y, Van Bortel LM, Nawrot T, Fagard R, Messerli FH, Safar M. Carotid intima-media thickness and antihypertensive treatment: a meta-analysis of randomized controlled trials. *Stroke*. 2006;37:1933-1940. doi: 10.1161/01.STR.0000227223.90239.13
247. Wang YR, Alexander GC, Stafford RS. Outpatient hypertension treatment, treatment intensification, and control in Western Europe and the United States. *Arch Intern Med*. 2007;167:141-147. doi: 10.1001/archinte.167.2.141
248. Warwick J, Falaschetti E, Rockwood K, Mitnitski A, Thijs L, Beckett N, Bulpitt C, Peters R. No evidence that frailty modifies the positive impact of antihypertensive treatment in very elderly people: an investigation of the impact of frailty upon treatment effect in the Hypertension in the Very Elderly Trial (HYVET) study, a double-blind, placebo-controlled study of antihypertensives in people with hypertension aged 80 and over. *BMC Med*. 2015;13:78. doi: 10.1186/s12916-015-0328-1
249. Weir MR, Hsueh WA, Nesbitt SD, Littlejohn TJ, 3rd, Graff A, Shojaee A, Wawerczak WF, Qian C, Jones CJ, Neutel JM. A titrate-to-goal study of switching patients uncontrolled on antihypertensive monotherapy to fixed-dose combinations of amlodipine and olmesartan medoxomil +/- hydrochlorothiazide. *J Clin Hypertens (Greenwich)*. 2011;13:404-412. doi: 10.1111/j.1751-7176.2011.00437.x
250. Whelton PK, Barzilay J, Cushman WC, Davis BR, Iamathi E, Kostis JB, Leenen FH, Louis GT, Margolis KL, Mathis DE, et al. Clinical outcomes in antihypertensive treatment of type 2 diabetes, impaired fasting glucose concentration, and normoglycemia: Antihypertensive

- and Lipid-Lowering Treatment to Prevent Heart Attack Trial (ALLHAT). *Arch Intern Med*. 2005;165:1401-1409. doi: 10.1001/archinte.165.12.1401
251. Williams B, Lacy PS, Thom SM, Cruickshank K, Stanton A, Collier D, Hughes AD, Thurston H, O'Rourke M, Investigators C, et al. Differential impact of blood pressure-lowering drugs on central aortic pressure and clinical outcomes: principal results of the Conduit Artery Function Evaluation (CAFE) study. *Circulation*. 2006;113:1213-1225. doi: 10.1161/CIRCULATIONAHA.105.595496
252. Williams B, MacDonald TM, Morant S, Webb DJ, Sever P, McInnes G, Ford I, Cruickshank JK, Caulfield MJ, Salsbury J, et al. Spironolactone versus placebo, bisoprolol, and doxazosin to determine the optimal treatment for drug-resistant hypertension (PATHWAY-2): a randomised, double-blind, crossover trial. *Lancet*. 2015;386:2059-2068. doi: 10.1016/S0140-6736(15)00257-3
253. Williams B, MacDonald TM, Morant SV, Webb DJ, Sever P, McInnes GT, Ford I, Cruickshank JK, Caulfield MJ, Padmanabhan S, et al. Endocrine and haemodynamic changes in resistant hypertension, and blood pressure responses to spironolactone or amiloride: the PATHWAY-2 mechanisms substudies. *Lancet Diabetes Endocrinol*. 2018;6:464-475. doi: 10.1016/S2213-8587(18)30071-8
254. Woo KS, Nicholls MG. High prevalence of persistent cough with angiotensin converting enzyme inhibitors in Chinese. *Br J Clin Pharmacol*. 1995;40:141-144.
255. Wright JT, Jr., Bakris G, Greene T, Agodoa LY, Appel LJ, Charleston J, Cheek D, Douglas-Baltimore JG, Gassman J, Glassock R, et al. Effect of blood pressure lowering and antihypertensive drug class on progression of hypertensive kidney disease: results from the AASK trial. *JAMA*. 2002;288:2421-2431. doi: 10.1001/jama.288.19.2421
256. Wright JT, Jr., Dunn JK, Cutler JA, Davis BR, Cushman WC, Ford CE, Haywood LJ, Leenen FH, Margolis KL, Papademetriou V, et al. Outcomes in hypertensive black and nonblack patients treated with chlorthalidone, amlodipine, and lisinopril. *JAMA*. 2005;293:1595-1608. doi: 10.1001/jama.293.13.1595
257. Wright JT, Jr., Harris-Haywood S, Pressel S, Barzilay J, Baimbridge C, Bareis CJ, Basile JN, Black HR, Dart R, Gupta AK, et al. Clinical outcomes by race in hypertensive patients with and without the metabolic syndrome: Antihypertensive and Lipid-Lowering Treatment to Prevent Heart Attack Trial (ALLHAT). *Arch Intern Med*. 2008;168:207-217. doi: 10.1001/archinternmed.2007.66
258. Xu W, Goldberg SI, Shubina M, Turchin A. Optimal systolic blood pressure target, time to intensification, and time to follow-up in treatment of hypertension: population based retrospective cohort study. *BMJ*. 2015;350:h158. doi: 10.1136/bmj.h158
259. Yang W, Chang J, Kahler KH, Fellers T, Orloff J, Wu EQ, Bensimon AG. Evaluation of compliance and health care utilization in patients treated with single pill vs. free combination antihypertensives. *Curr Med Res Opin*. 2010;26:2065-2076. doi: 10.1185/03007995.2010.494462
260. Yusuf S, Lonn E, Pais P, Bosch J, Lopez-Jaramillo P, Zhu J, Xavier D, Avezum A, Leiter LA, Piegas LS, et al. Blood-Pressure and Cholesterol Lowering in Persons without Cardiovascular Disease. *N Engl J Med*. 2016;374:2032-2043. doi: 10.1056/NEJMoa1600177
261. Yusuf S, Pfeffer MA, Swedberg K, Granger CB, Held P, McMurray JJ, Michelson EL, Olofsson B, Ostergren J, Investigators C, et al. Effects of candesartan in patients with chronic heart failure and preserved left-ventricular ejection fraction: the CHARM-Preserved Trial. *Lancet*. 2003;362:777-781. doi: 10.1016/S0140-6736(03)14285-7

262. Zanchetti A, Crepaldi G, Bond MG, Gallus G, Veglia F, Mancia G, Ventura A, Baggio G, Sampieri L, Rubba P, et al. Different effects of antihypertensive regimens based on fosinopril or hydrochlorothiazide with or without lipid lowering by pravastatin on progression of asymptomatic carotid atherosclerosis: principal results of PHYLLIS--a randomized double-blind trial. *Stroke*. 2004;35:2807-2812. doi: 10.1161/01.STR.0000147041.00840.59
263. Zanchetti A, Julius S, Kjeldsen S, McInnes GT, Hua T, Weber M, Laragh JH, Plat F, Battagay E, Calvo-Vargas C, et al. Outcomes in subgroups of hypertensive patients treated with regimens based on valsartan and amlodipine: An analysis of findings from the VALUE trial. *J Hypertens*. 2006;24:2163-2168. doi: 10.1097/01.hjh.0000249692.96488.46
264. Zhao D, Liu H, Dong P, Zhao J. A meta-analysis of add-on use of spironolactone in patients with resistant hypertension. *Int J Cardiol*. 2017;233:113-117. doi: 10.1016/j.ijcard.2016.12.158
265. Zhao D, Wang ZM, Wang LS. Prevention of atrial fibrillation with renin-angiotensin system inhibitors on essential hypertensive patients: a meta-analysis of randomized controlled trials. *J Biomed Res*. 2015;29:475-485. doi: 10.7555/JBR.29.20140149
266. Zhao R, Liu FD, Wang S, Peng JL, Tao XX, Zheng B, Zhang QT, Yao Q, Shen XL, Li WT, et al. Blood Pressure Reduction in the Acute Phase of an Ischemic Stroke Does Not Improve Short- or Long-Term Dependency or Mortality: A Meta-Analysis of Current Literature. *Medicine (Baltimore)*. 2015;94:e896. doi: 10.1097/MD.0000000000000896
267. Zoungas S, Chalmers J, Neal B, Billot L, Li Q, Hirakawa Y, Arima H, Monaghan H, Joshi R, Colagiuri S, et al. Follow-up of blood-pressure lowering and glucose control in type 2 diabetes. *N Engl J Med*. 2014;371:1392-1406. doi: 10.1056/NEJMoa1407963

**Figure S1. Flowchart of sex - based analysis and reporting in antihypertensive medication studies informing clinical hypertension guidelines after 2015.**

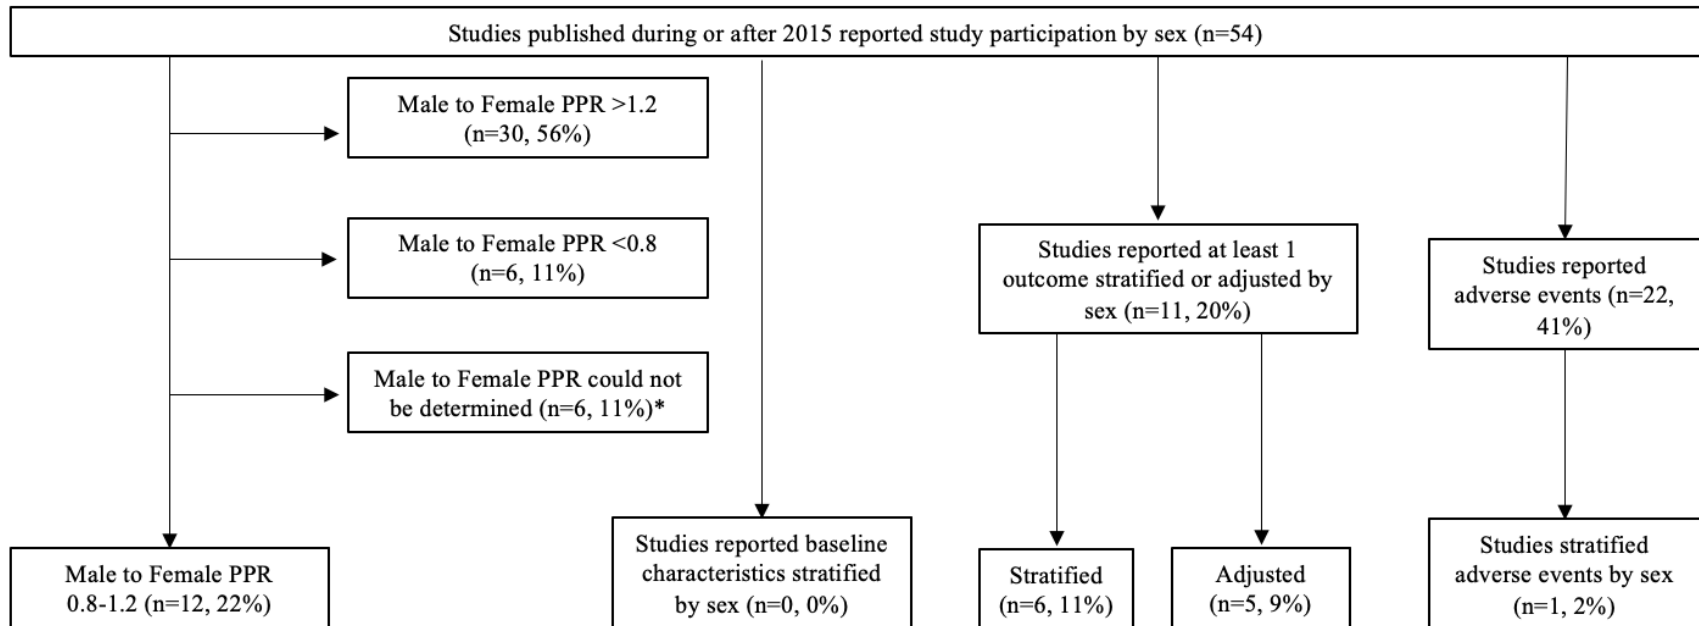

Supplement: JAH3-13-e030613-s001.pdf [file JAH3-13-e030613-s001.pdf]
